# Supplementary material for: Structure–reactivity relationship of probes based on the H2S-mediated reductive cleavage of the CC bond
Source: Royal Society of Chemistry journal article supplement (doi:10.1039/d0nj02307h), 2020-01-01
Supplement: d0nj02307h1.pdf [file d0nj02307h1.pdf]

# Structure-reactivity relationship of probes based on H<sub>2</sub>S-mediated reductive cleavage of C=C bond

Chunfei Wang, Jingyun Tan and Xuanjun Zhang\*

Cancer Centre and Centre of Reproduction, Development and Aging, Faculty of Health Sciences, University of Macau, Taipa, Macau SAR, 999078, China. \*e-mail: [xuanjunzhang@um.edu.mo](mailto:xuanjunzhang@um.edu.mo).

## Table of Contents

### 1. Limit of detection

### 2. NMR spectrum

- Fig. S1. <sup>1</sup>H NMR spectrum of **PTZ-P1** in DMSO.
- Fig. S2. <sup>13</sup>C NMR spectrum of **PTZ-P1** in DMSO.
- Fig. S3. <sup>1</sup>H NMR spectrum of **PTZ-P2** in DMSO.
- Fig. S4. <sup>13</sup>C NMR spectrum of **PTZ-P2** in DMSO.
- Fig. S5. <sup>1</sup>H NMR spectrum of **PTZ-P4** in DMSO.
- Fig. S6. <sup>13</sup>C NMR spectrum of **PTZ-P4** in DMSO.
- Fig. S7. <sup>1</sup>H NMR spectrum of **PTZ-P5** in DMSO.
- Fig. S8. <sup>13</sup>C NMR spectrum of **PTZ-P5** in DMSO.
- Fig. S9. <sup>1</sup>H NMR spectrum of **KZ-1** in CDCl<sub>3</sub>.
- Fig. S10. <sup>13</sup>C NMR spectrum of **KZ-1** in CDCl<sub>3</sub>.
- Fig. S11. <sup>1</sup>H NMR spectrum of **KZ-2** in Acetone.
- Fig. S12. <sup>13</sup>C NMR spectrum of **KZ-2** in Acetone.
- Fig. S13. <sup>1</sup>H NMR spectrum of **KZ-3** in Acetone.
- Fig. S14. <sup>13</sup>C NMR spectrum of **KZ-3** in Acetone.
- Fig. S15. <sup>1</sup>H NMR spectrum of **KZ-P** in Acetone.
- Fig. S16. <sup>13</sup>C NMR spectrum of **KZ-P** in Acetone.
- Fig. S17. <sup>1</sup>H NMR spectrum of **NNP-1** in CDCl<sub>3</sub>.
- Fig. S18. <sup>13</sup>C NMR spectrum of **NNP-1** in CDCl<sub>3</sub>.
- Fig. S19. <sup>1</sup>H NMR spectrum of **NNP-P** in CDCl<sub>3</sub>.
- Fig. S20. <sup>13</sup>C NMR spectrum of **NNP-P** in CDCl<sub>3</sub>.
- Fig. S21. <sup>1</sup>H NMR spectrum of **PTZ-1** in CDCl<sub>3</sub>.
- Fig. S22. <sup>13</sup>C NMR spectrum of **PTZ-1** in CDCl<sub>3</sub>.
- Fig. S23. <sup>1</sup>H NMR spectrum of **PTZ-2** in CDCl<sub>3</sub>.
- Fig. S24. <sup>13</sup>C NMR spectrum of **PTZ-2** in CDCl<sub>3</sub>.
- Fig. S25. <sup>1</sup>H NMR spectrum of **PTZ-3** in CDCl<sub>3</sub>.
- Fig. S26. <sup>1</sup>H NMR spectrum of **PTZ-3** in CDCl<sub>3</sub>.
- Fig. S27. <sup>1</sup>H NMR spectrum of **NPTZ-P1** in DMSO.
- Fig. S28. <sup>13</sup>C NMR spectrum of **NPTZ-P1** in DMSO.
- Fig. S29. <sup>1</sup>H NMR spectrum of **NPTZ-P2** in DMSO.
- Fig. S30. <sup>13</sup>C NMR spectrum of **NPTZ-P2** in DMSO.
- Fig. S31. <sup>1</sup>H NMR spectrum of **SF-1** in DMSO.
- Fig. S32. <sup>13</sup>C NMR spectrum of **SF-1** in DMSO.
- Fig. S33. <sup>1</sup>H NMR spectrum of **SF-2** in DMSO.
- Fig. S34. <sup>13</sup>C NMR spectrum of **SF-2** in DMSO.
- Fig. S35. <sup>1</sup>H NMR spectrum of **SF-3** in DMSO.
- Fig. S36. <sup>13</sup>C NMR spectrum of **SF-3** in DMSO.

**Fig. S37.**  $^1\text{H}$  NMR spectrum of **SF-4** in DMSO.

**Fig. S38.**  $^{13}\text{C}$  NMR spectrum of **SF-4** in DMSO.

### 3. HRMS spectrum

**Fig. S39.** HRMS spectra of **PTZ-P1**.

**Fig. S40.** HRMS spectra of **PTZ-P2**.

**Fig. S41.** HRMS spectra of **PTZ-P4**.

**Fig. S42.** HRMS spectra of **PTZ-P5**.

**Fig. S43.** HRMS spectra of **KZ-P**.

**Fig. S44.** HRMS spectra of **NNP-P**.

**Fig. S45.** HRMS spectra of **NPTZ-P1**.

**Fig. S46.** HRMS spectra of **NPTZ-P2**.

**Fig. S47.** HRMS spectra of **SF4**.

**Fig. S48.** The results of **KZ-P** and **NNP-P** reacted with  $\text{H}_2\text{S}$ .

**Fig. S49.** Absorption and fluorescent spectra of probes (10  $\mu\text{M}$ , **PTZ-P1**, **PTZ-P2**, **PTZ-P3**, **PTZ-P4**, **PTZ-P5**, **KZ-P**, **NNP-P** and **NPTZ-P1**) in different solvents (MeOH, DMF and THF),  $\lambda_{\text{ex}}=330$  nm. Full lines and dotted lines represent absorption and fluorescent spectra respectively.

**Fig. S50.** Fluorescent spectra of **NPTZ-P2** (10  $\mu\text{M}$ ) in PBS buffer (pH=7.4)/DMSO (1/2, 2% v/v PEG 400) with addition of  $\text{H}_2\text{S}$  (0-600  $\mu\text{M}$ ),  $\lambda_{\text{ex}}=390$  nm.

**Fig. S51.** Time-dependent fluorescence intensity changes of **PTZ-P3** (A), **PTZ-P6** (B), **NPTZ-P1** (C) and **NPTZ-P2** (D) (10  $\mu\text{M}$ ) with  $\text{H}_2\text{S}$  (100  $\mu\text{M}$ ) in in PBS buffer (pH=7.4)/DMSO (1/2 v/v, 2% PEG 400).

**Fig. S52.** Viabilities of HeLa cells after incubation with different concentrations of **NPTZ-P1** and **NPTZ-P2** for 24 h.

**Fig. S53.** The fluorescence emission changes with the pH titration curve of 10  $\mu\text{M}$  **NPTZ-P1** ( $\lambda_{\text{ex}}=330$  nm,  $\lambda_{\text{em}}=455$  nm) and **NPTZ-P2** ( $\lambda_{\text{ex}}=550$  nm,  $\lambda_{\text{em}}=635$  nm), pH value: 2.79, 3.39, 4.16, 4.42, 5.07, 6.32, 6.87, 7.4, 8.37 (from left to right).

**Table S1.** Calculated linear absorption properties (nm), excitation energy (eV), oscillator strengths and major contribution for selected compounds.

## 1. Limit of detection

According to the following Equation, we calculated the limit of detection of **NPTZ-P1** and **NPTZ-P2** to H<sub>2</sub>S.

$$\text{Equation: } C_L = kS_{bi}/m$$

Where, m is the slope of the linear regression equation (shown in Figure 3C and 3G). S<sub>bi</sub> is the standard deviation of the blank measures. Generally, k=3, P<0.01.

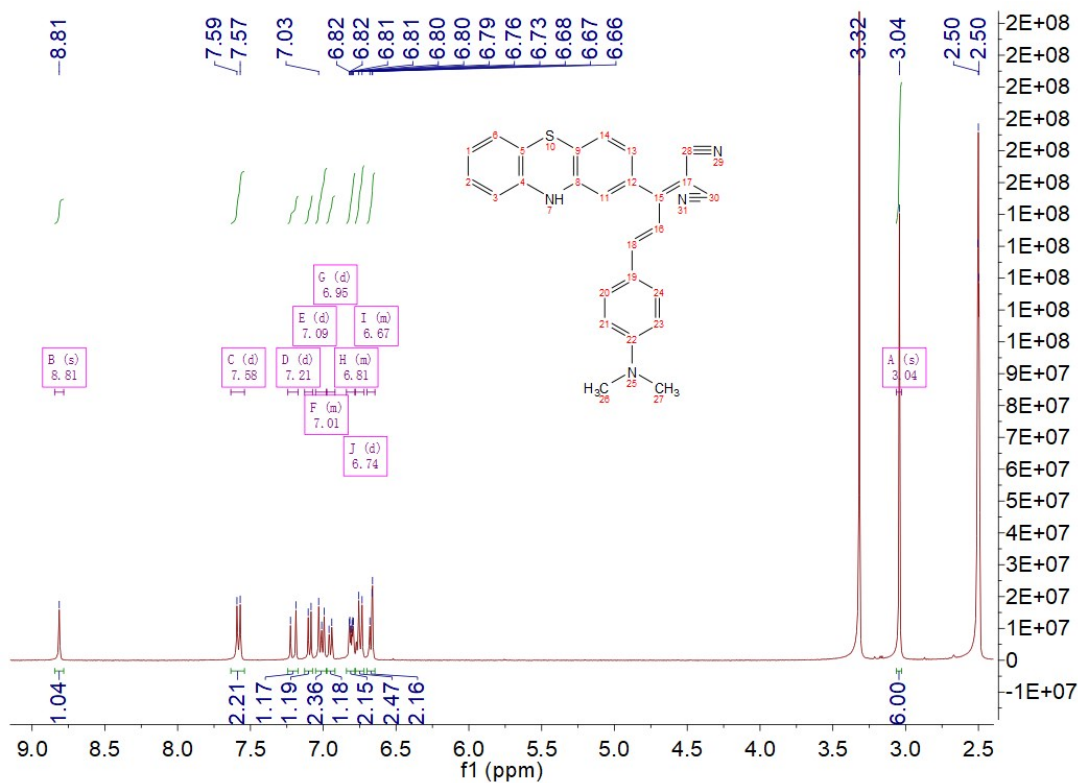

Fig. S1.  $^1\text{H}$  NMR spectrum of **PTZ-P1** in DMSO.

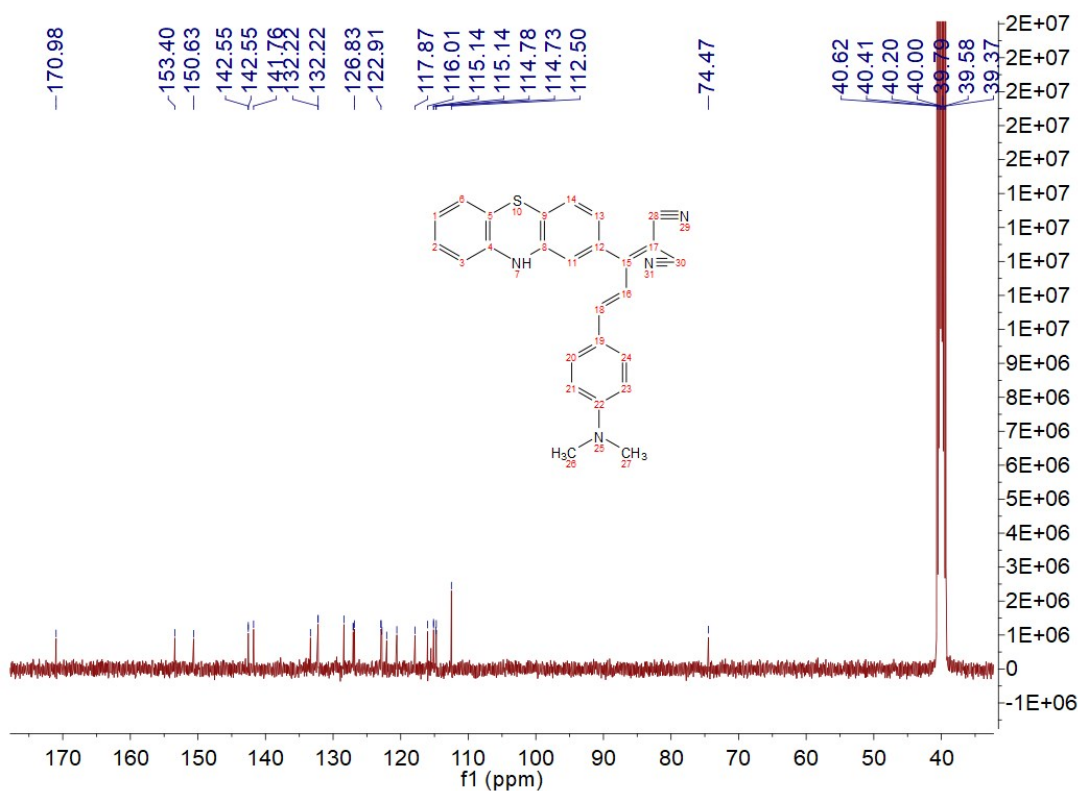

Fig. S2.  $^{13}\text{C}$  NMR spectrum of **PTZ-P1** in DMSO.

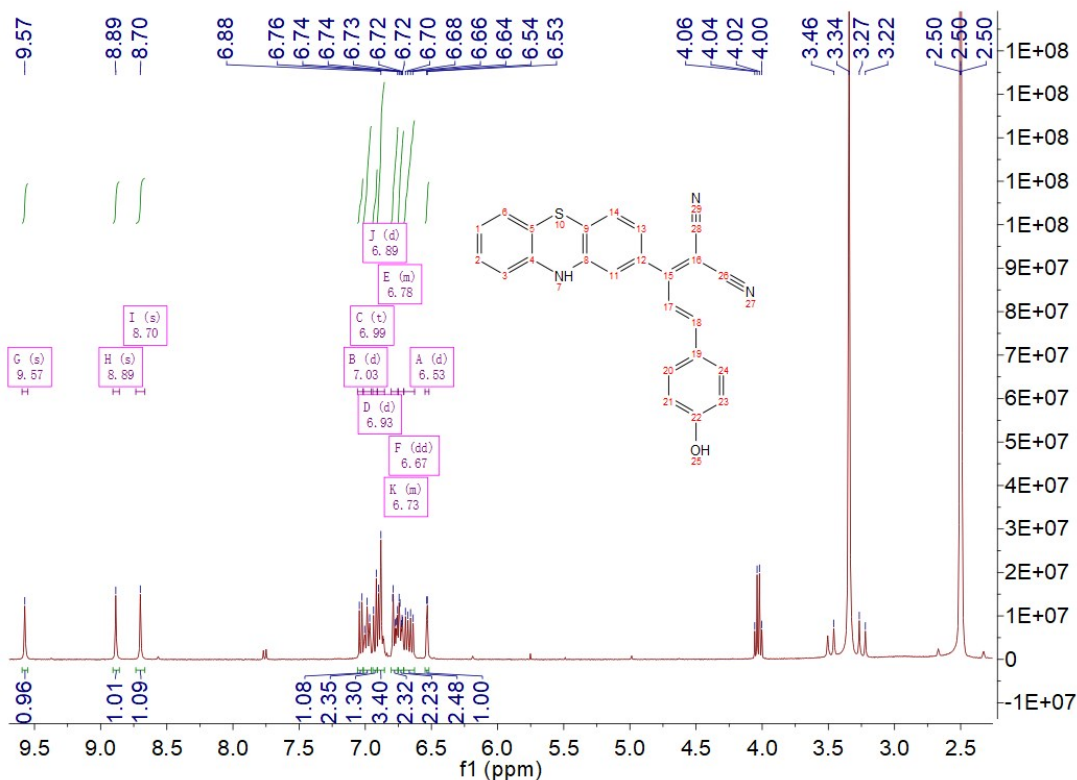

Fig. S3.  $^1\text{H}$  NMR spectrum of PTZ-P2 in DMSO.

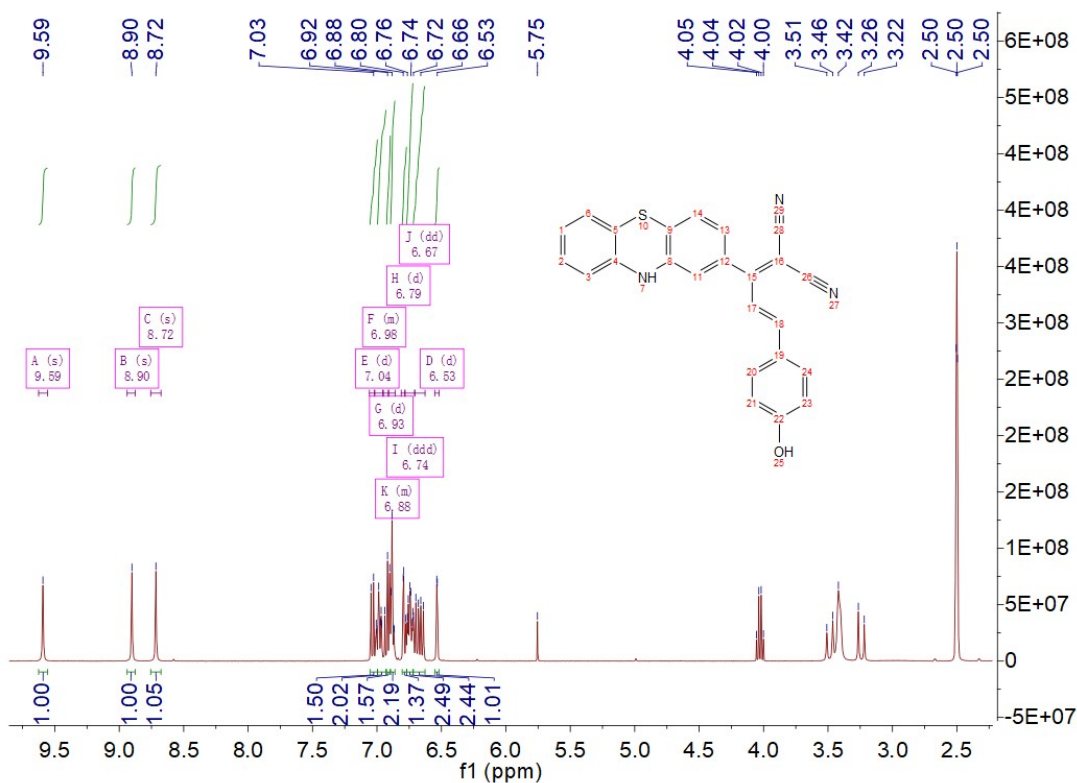

Fig. S4.  $^{13}\text{C}$  NMR spectrum of PTZ-P2 in DMSO.

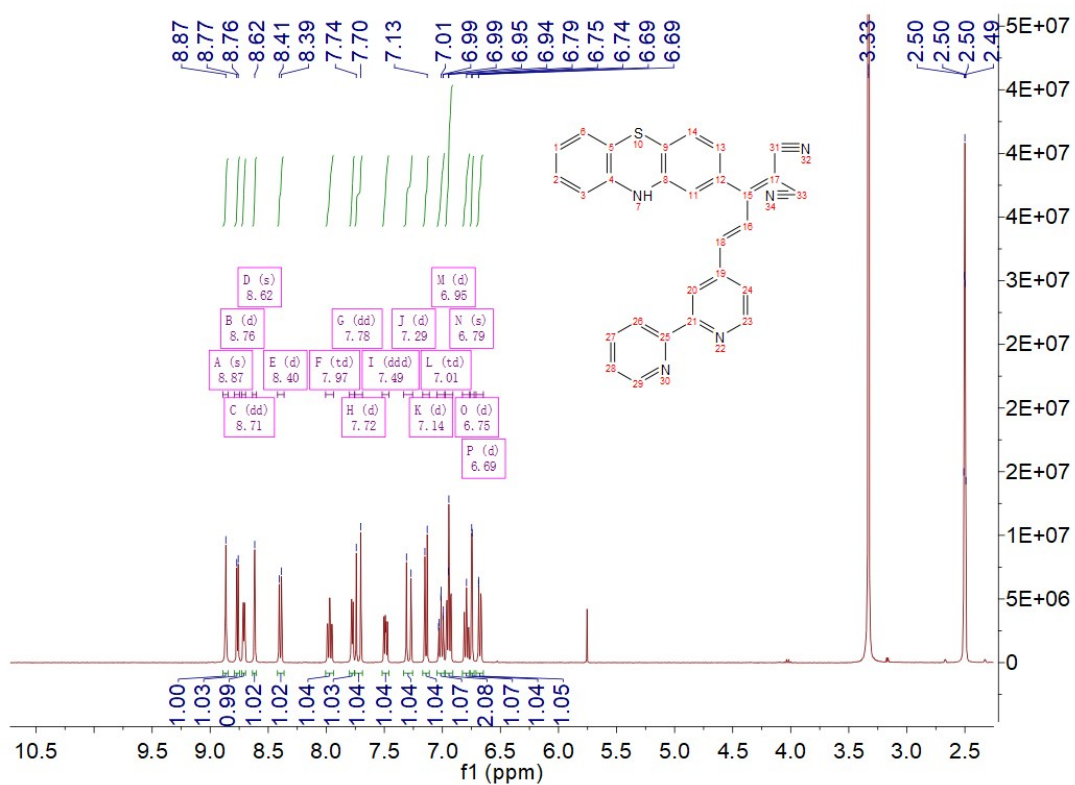

**Fig. S5.**  $^1\text{H}$  NMR spectrum of PTZ-P4 in DMSO.

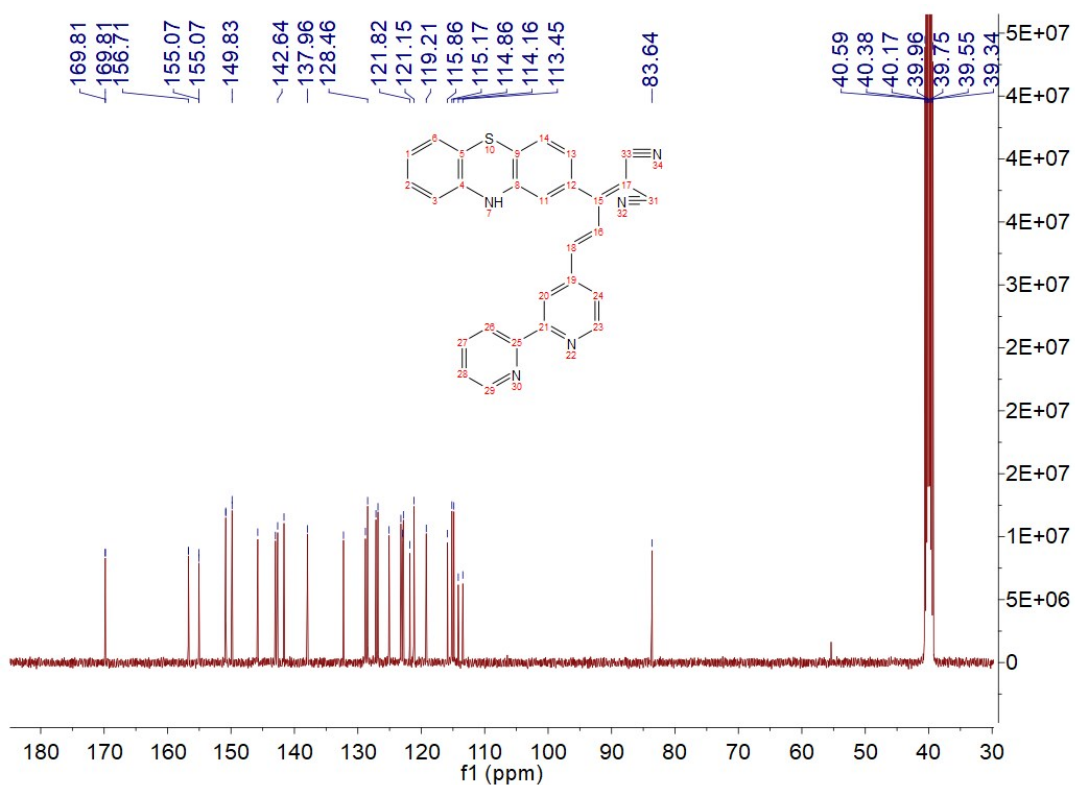

**Fig. S6.**  $^{13}\text{C}$  NMR spectrum of PTZ-P4 in DMSO.

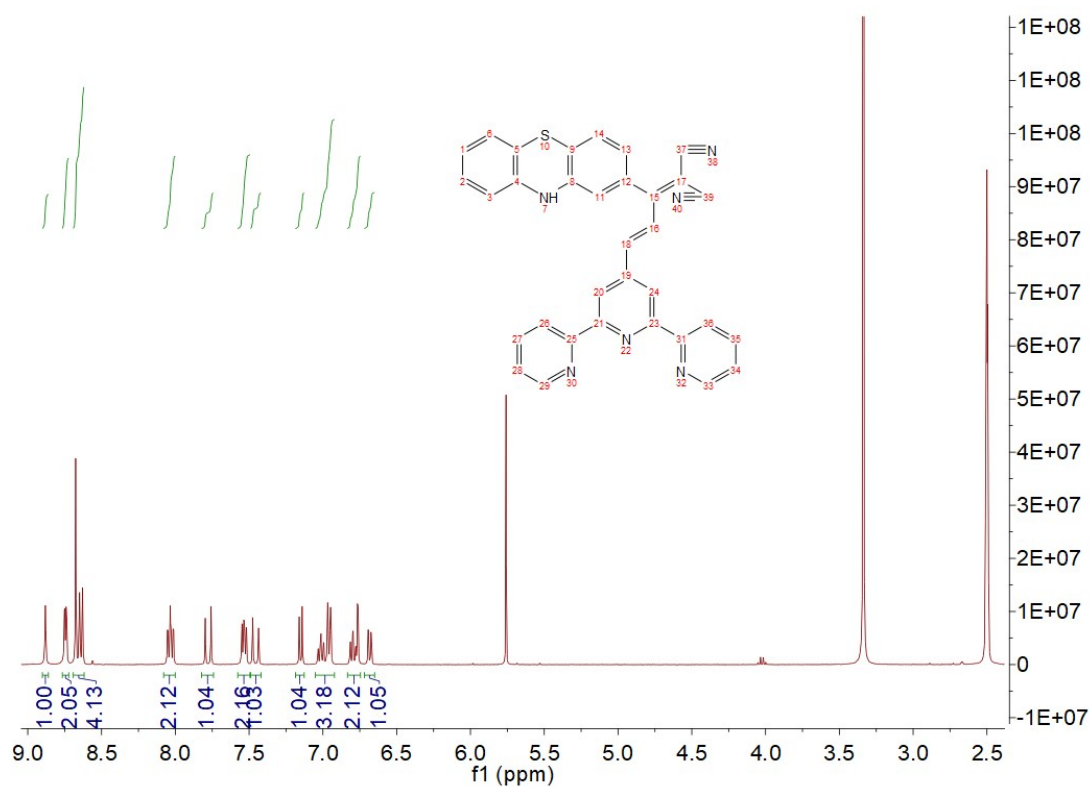

**Fig. S7.**  $^1\text{H}$  NMR spectrum of **PTZ-P5** in DMSO.

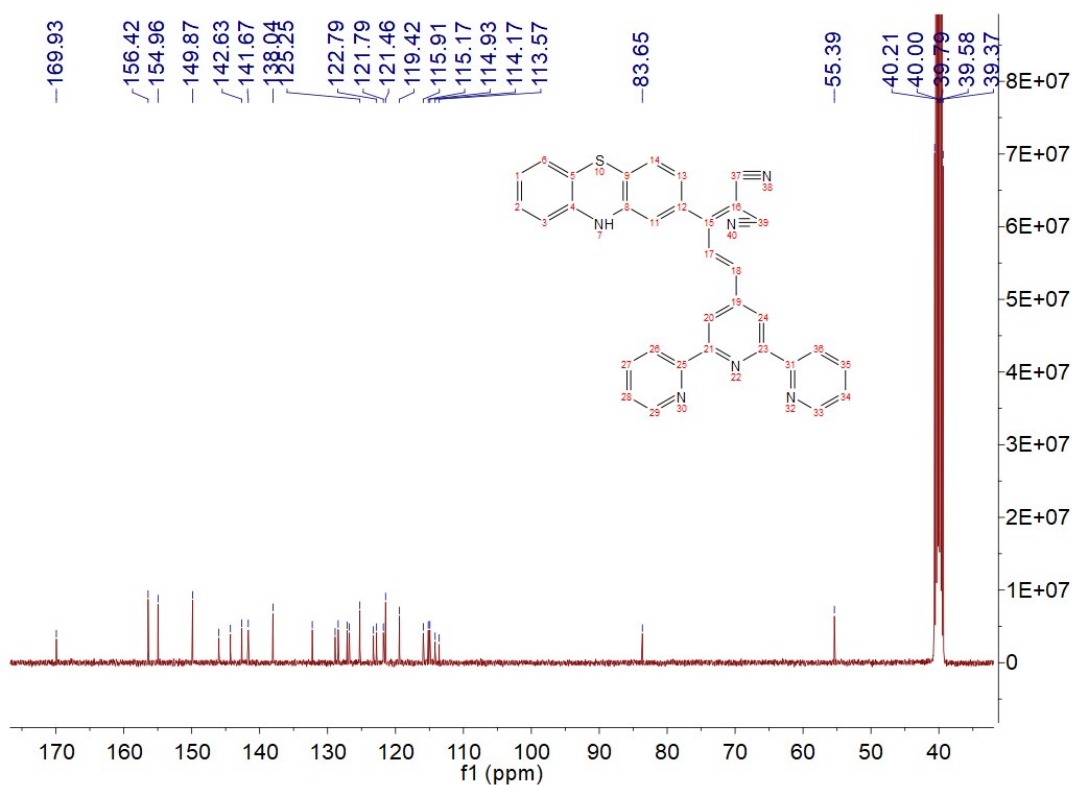

**Fig. S8.**  $^{13}\text{C}$  NMR spectrum of **PTZ-P5** in DMSO.



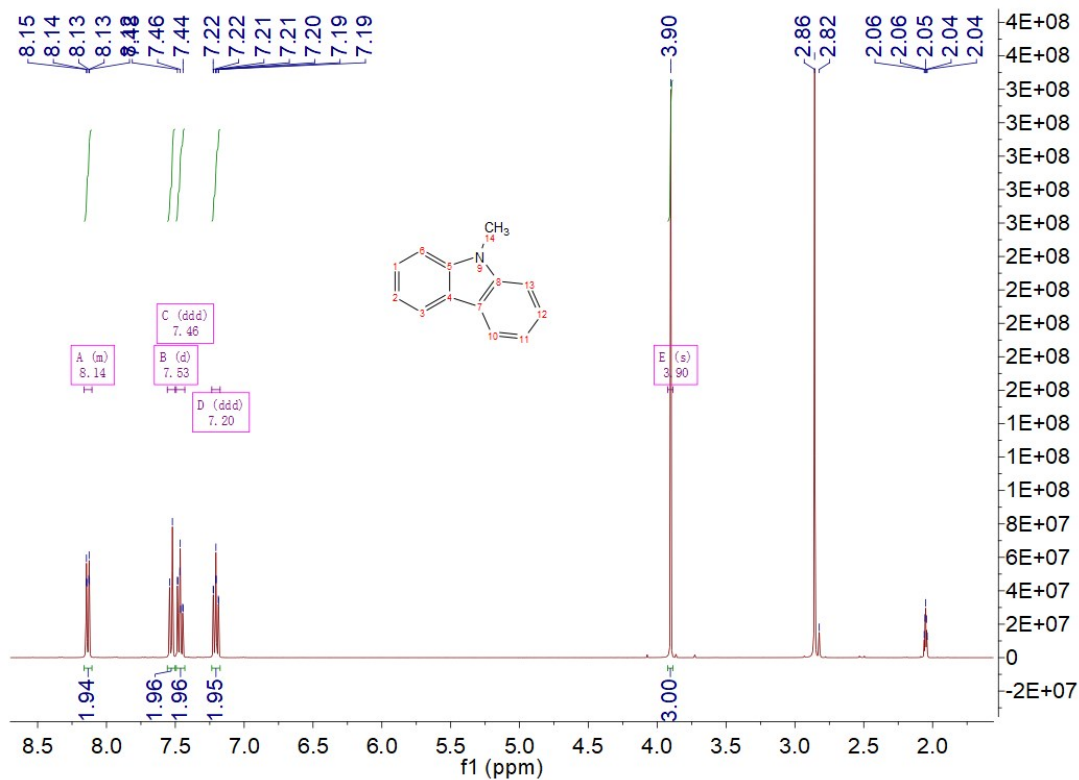

Fig. S9. <sup>1</sup>H NMR spectrum of KZ-1 in CDCl<sub>3</sub>.

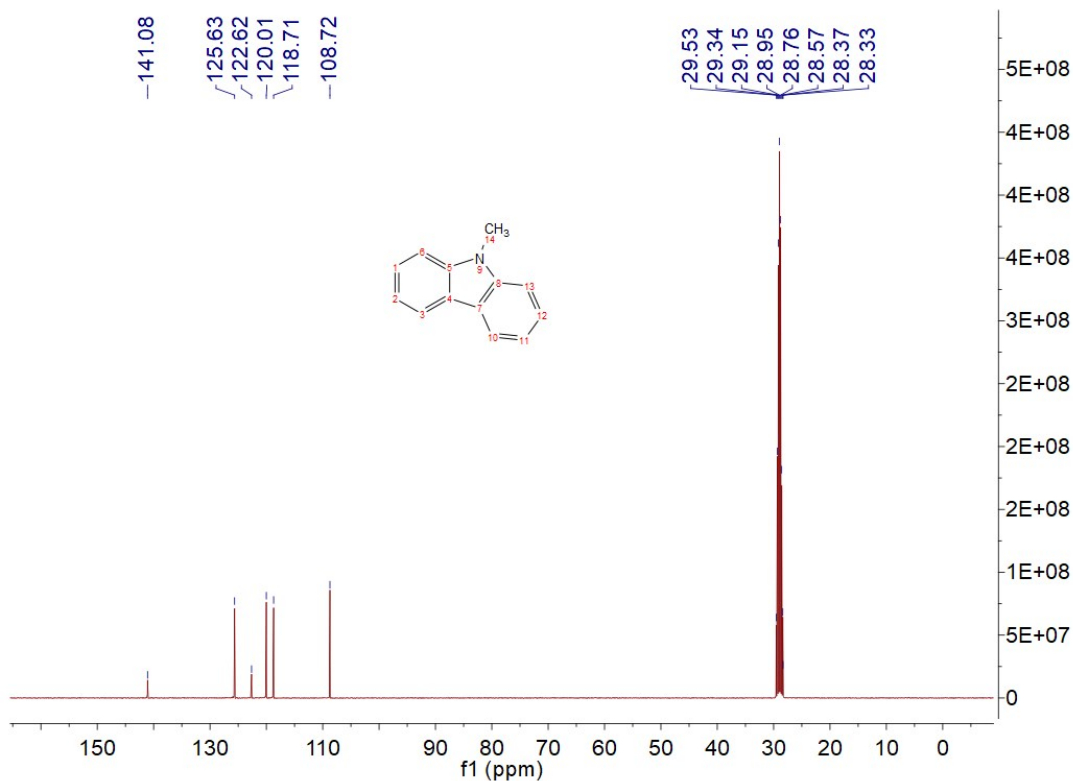

Fig. S10. <sup>13</sup>C NMR spectrum of KZ-1 in CDCl<sub>3</sub>.



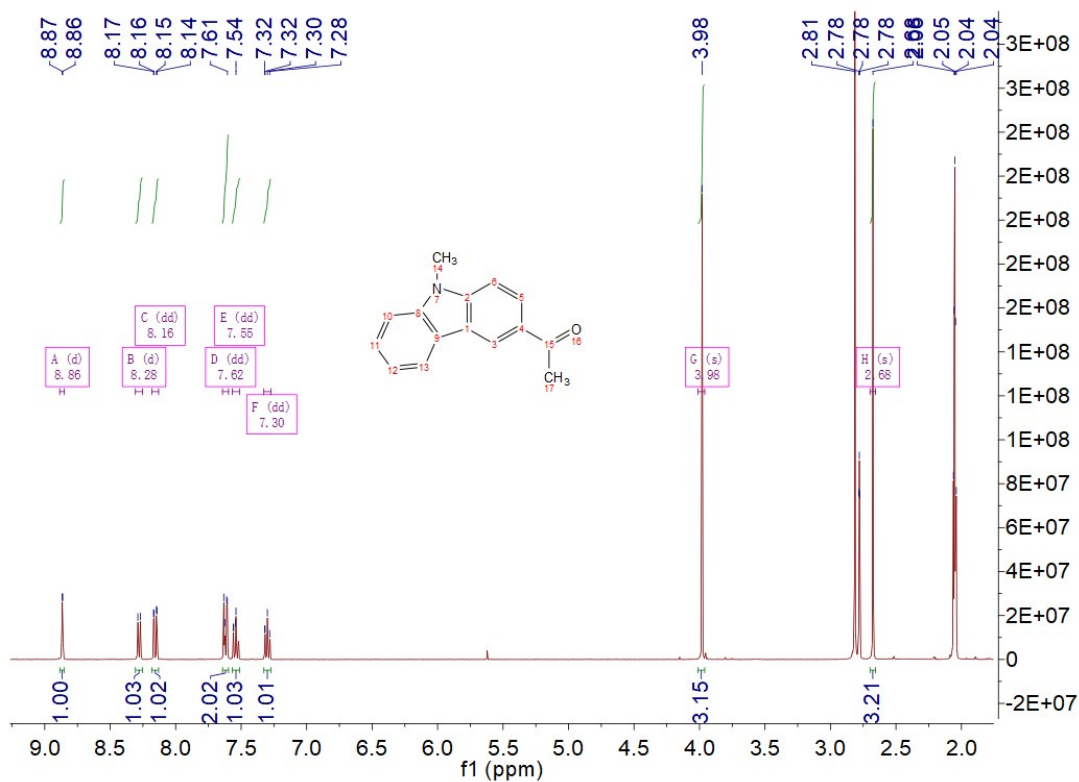

Fig. S11. <sup>1</sup>H NMR spectrum of KZ-2 in Acetone.

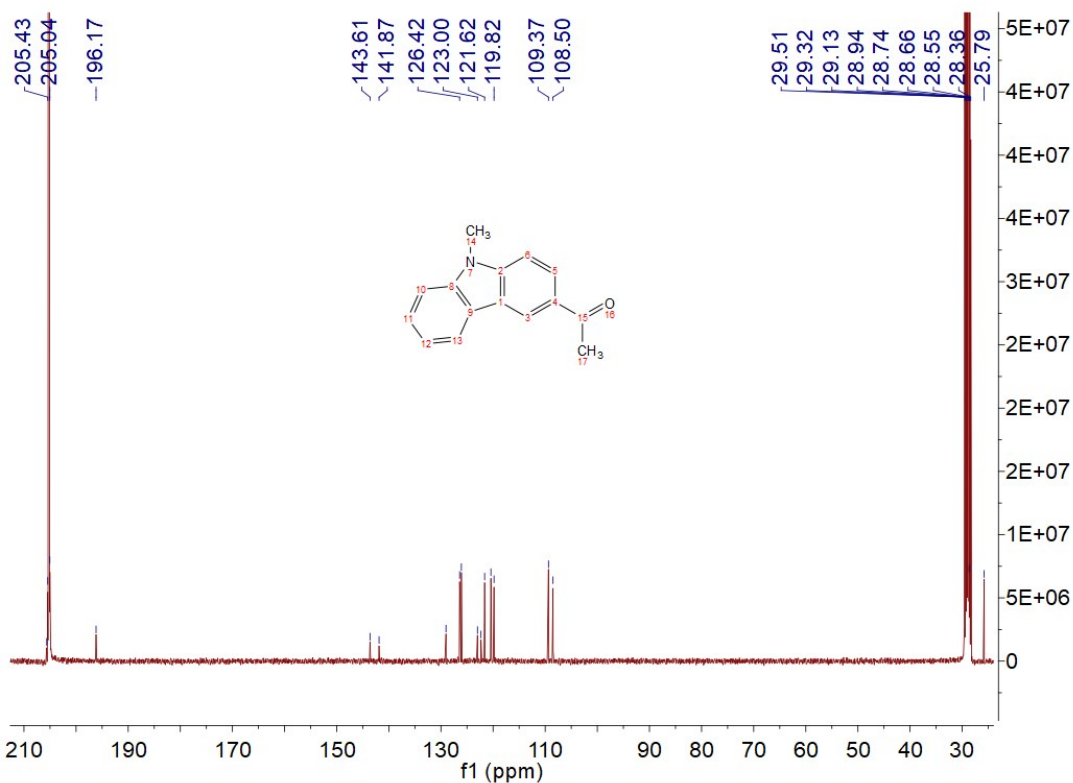

Fig. S12. <sup>13</sup>C NMR spectrum of KZ-2 in Acetone.

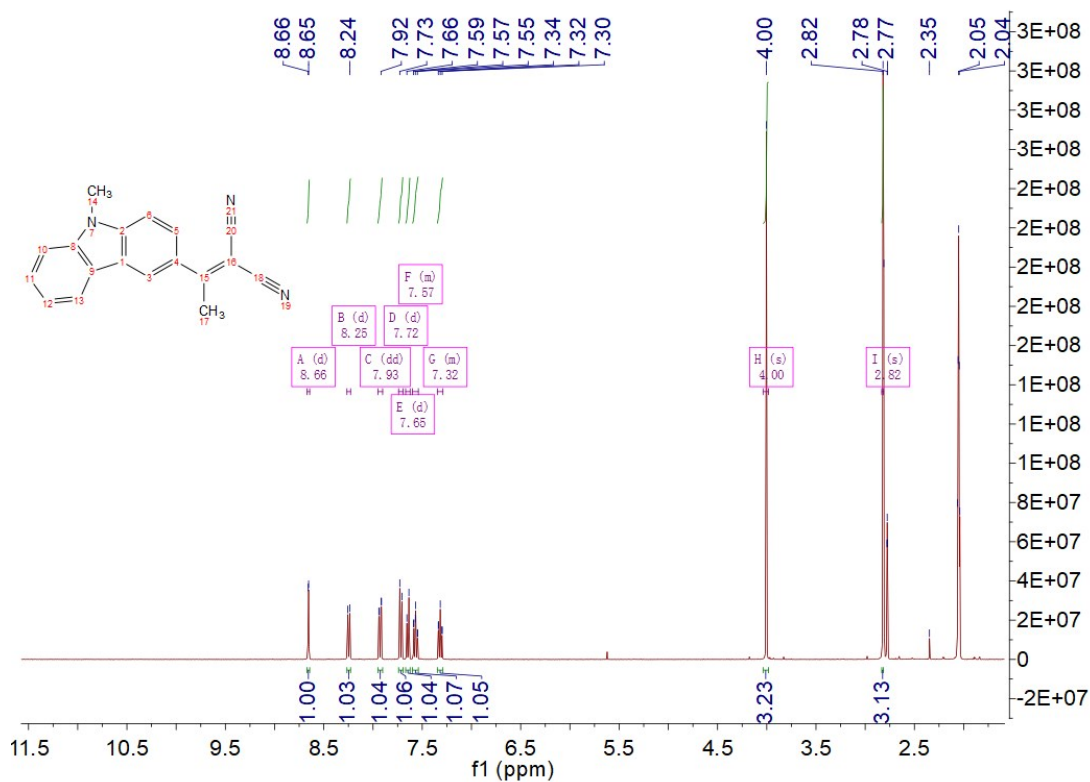

Fig. S13. <sup>1</sup>H NMR spectrum of KZ-3 in Acetone.

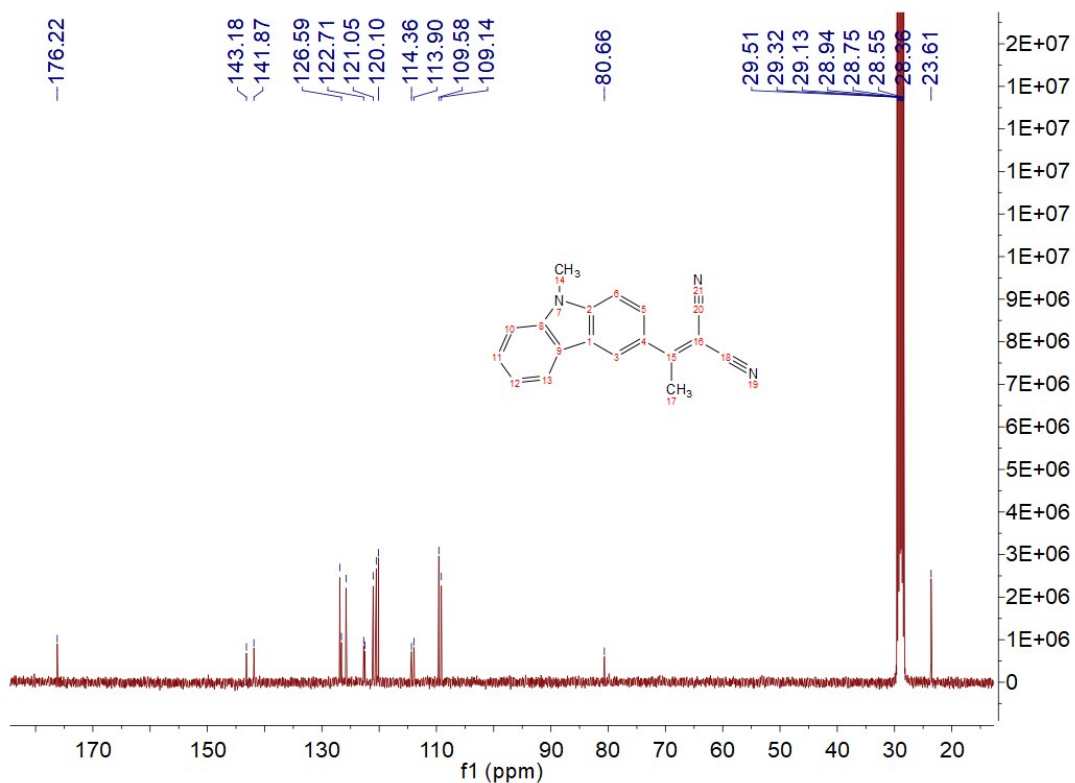

Fig. S14. <sup>13</sup>C NMR spectrum of KZ-3 in Acetone.

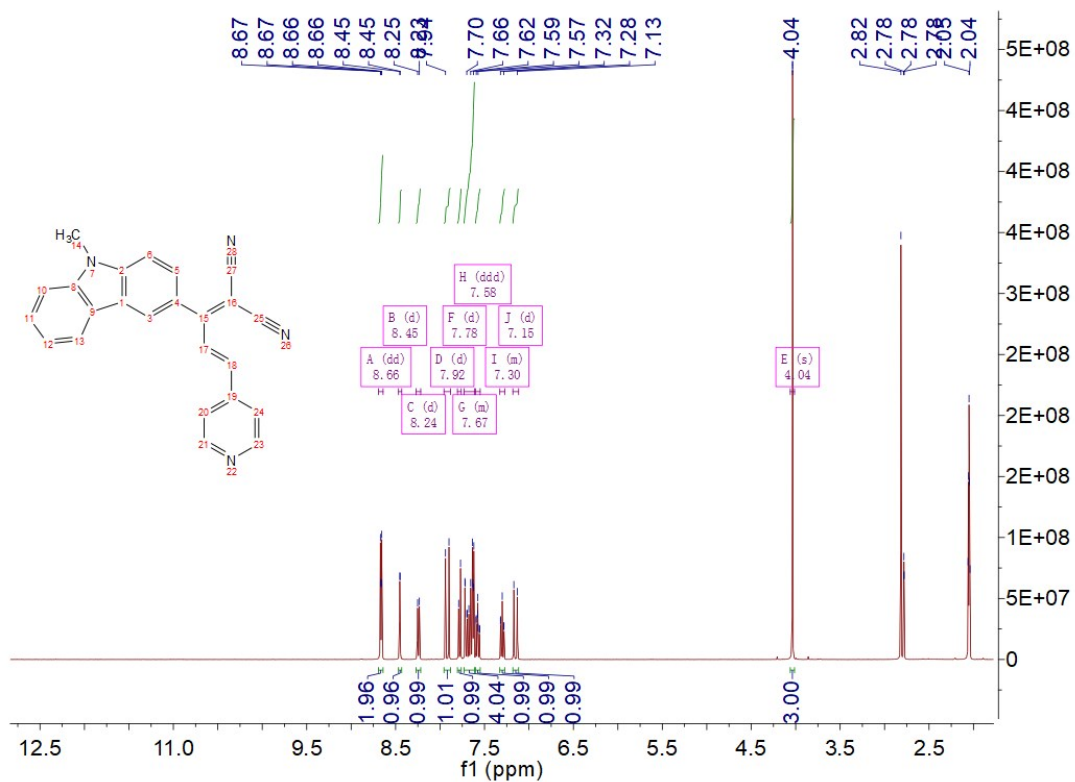

Fig. S15. <sup>1</sup>H NMR spectrum of KZ-P in Acetone.

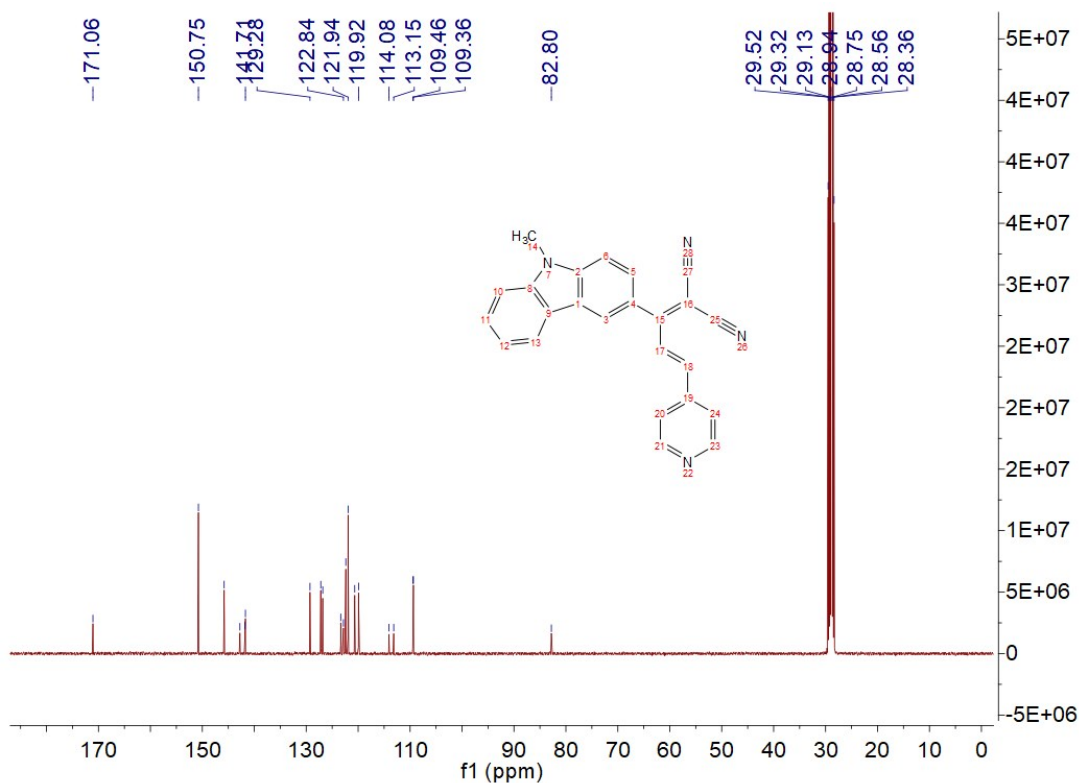

Fig. S16. <sup>13</sup>C NMR spectrum of KZ-P in Acetone.

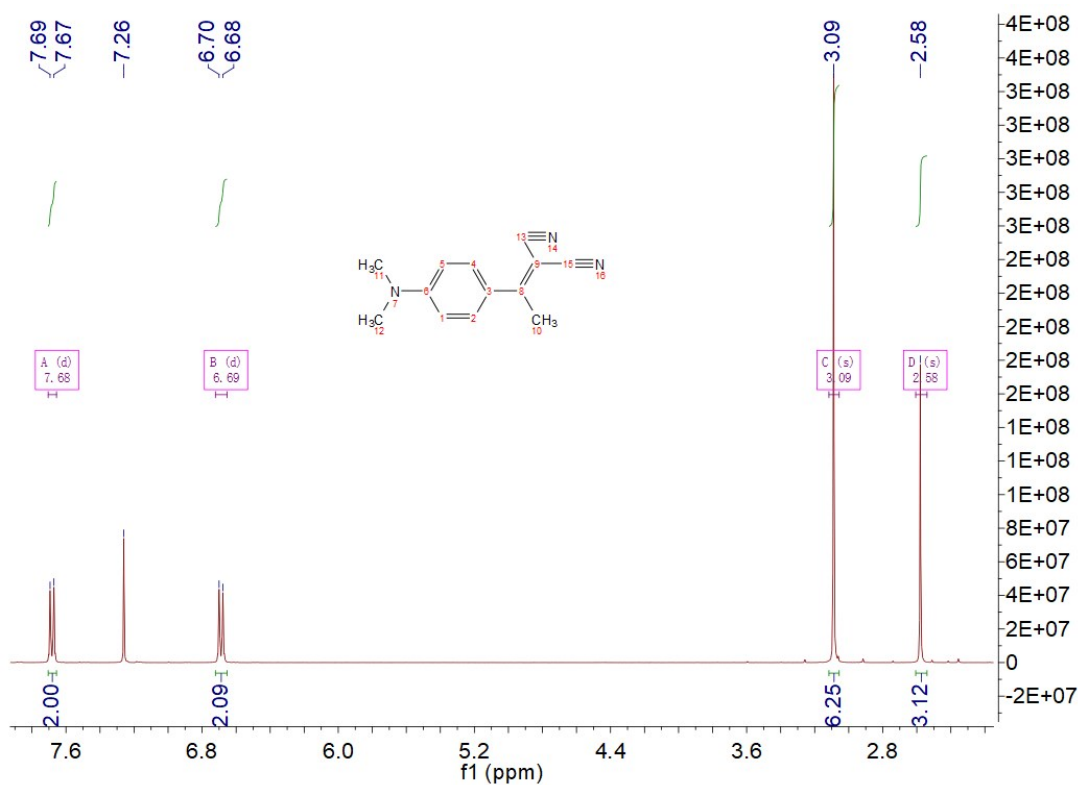

Fig. S17. <sup>1</sup>H NMR spectrum of NNP-1 in CDCl<sub>3</sub>.

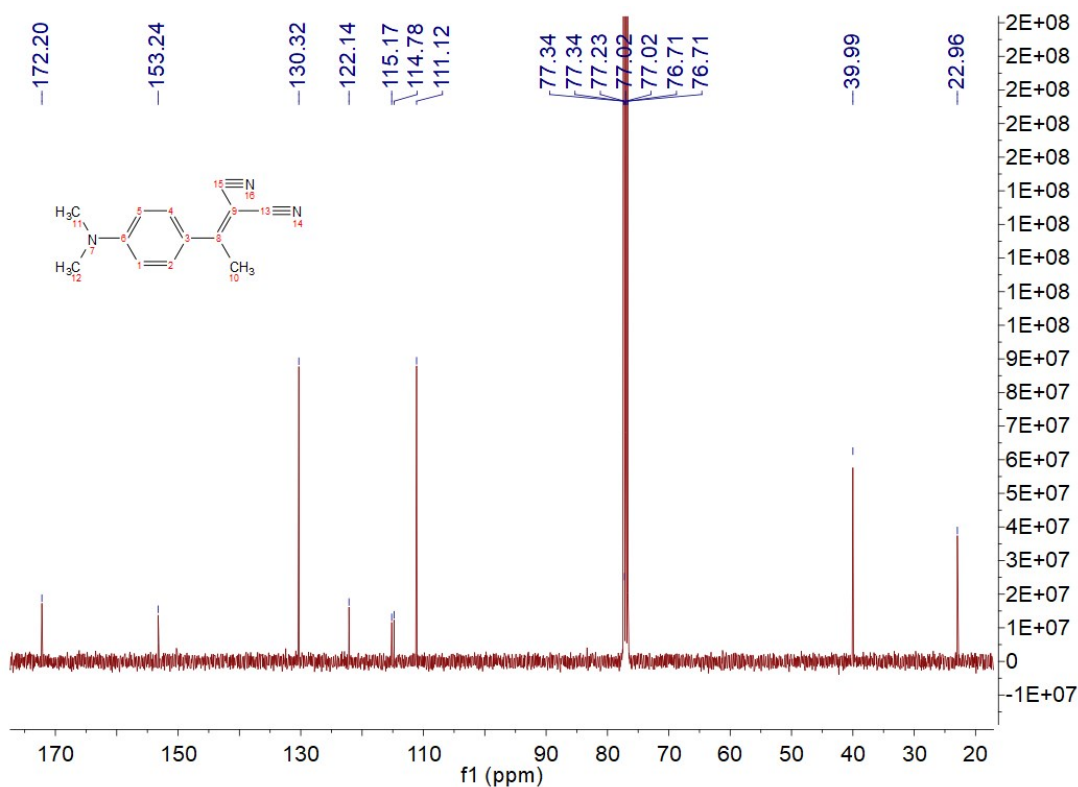

Fig. S18. <sup>13</sup>C NMR spectrum of NNP-1 in CDCl<sub>3</sub>.

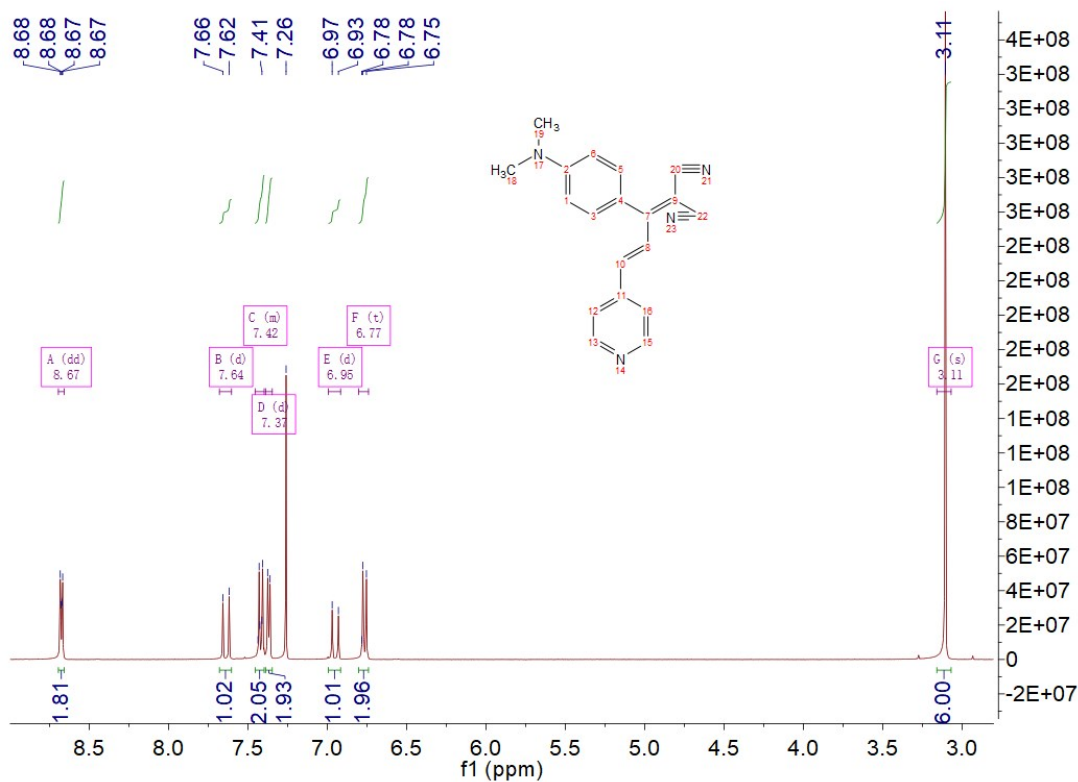

Fig. S19. <sup>1</sup>H NMR spectrum of NNP-P in CDCl<sub>3</sub>.

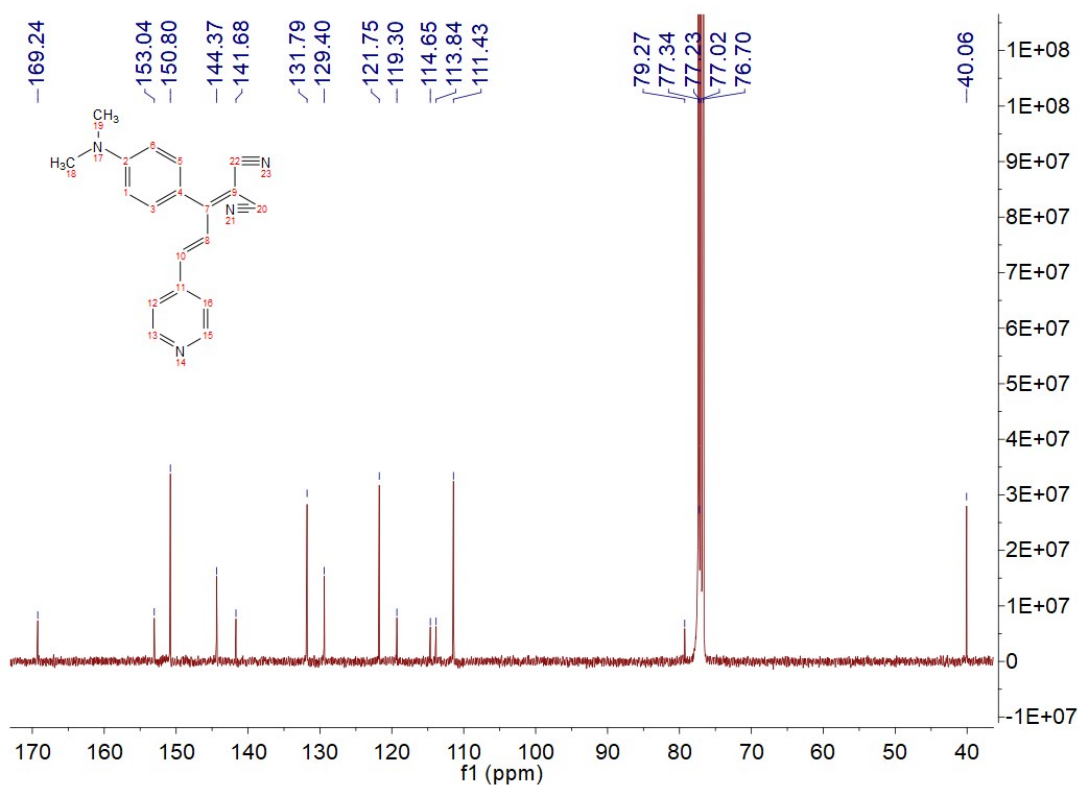

Fig. S20. <sup>13</sup>C NMR spectrum of NNP-P in CDCl<sub>3</sub>.

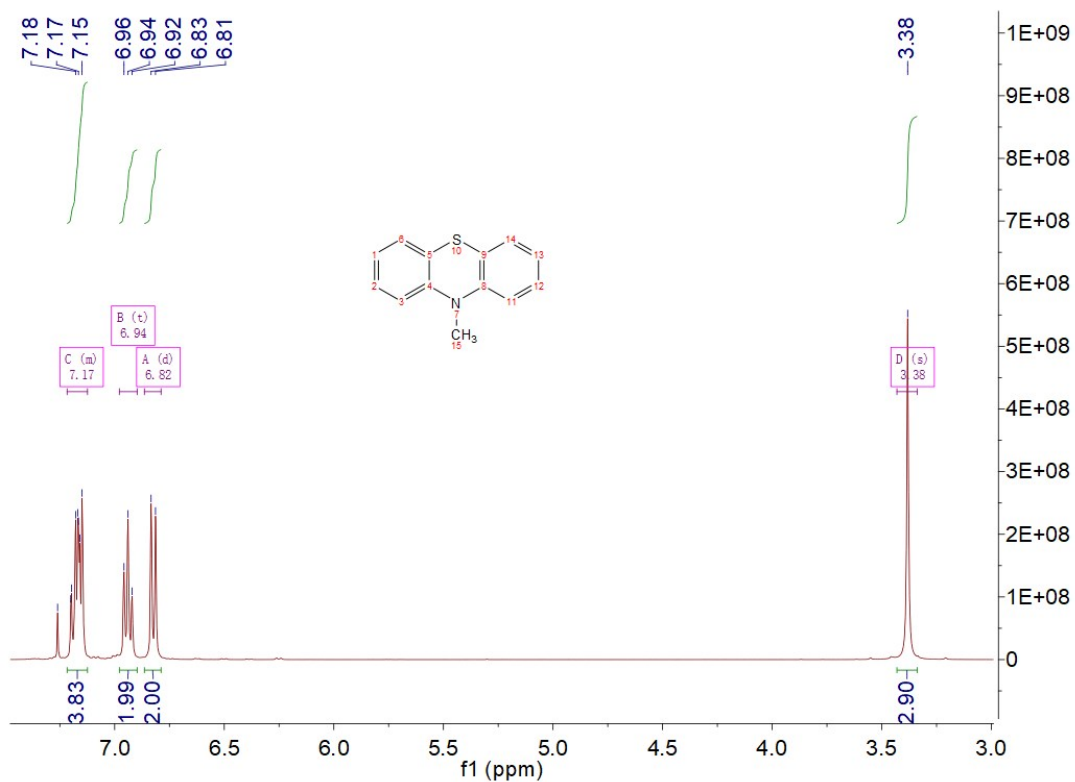

Fig. S21. <sup>1</sup>H NMR spectrum of PTZ-1 in CDCl<sub>3</sub>.

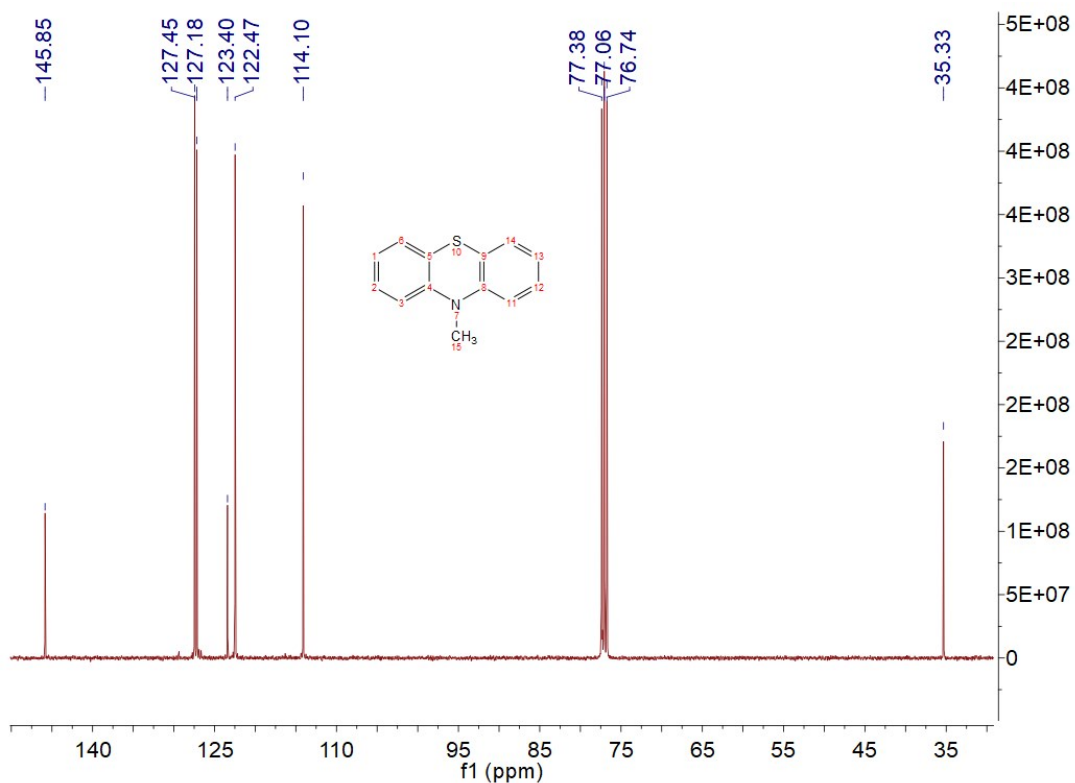

Fig. S22. <sup>13</sup>C NMR spectrum of PTZ-1 in CDCl<sub>3</sub>.



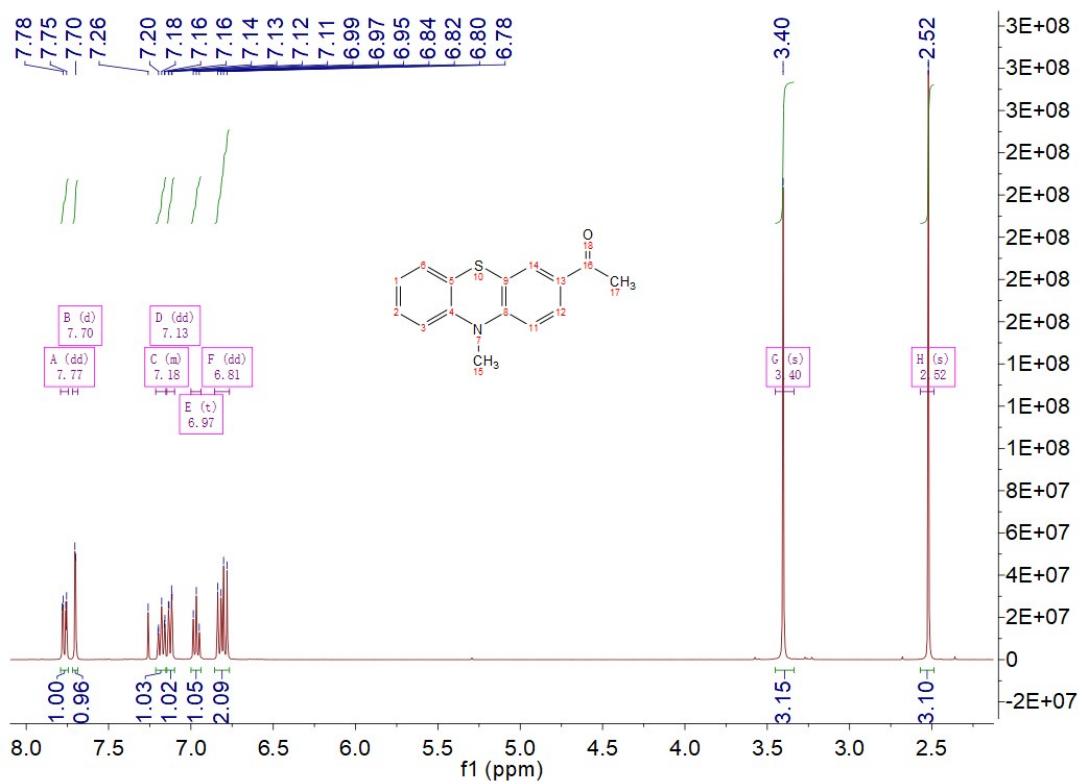

Fig. S23. <sup>1</sup>H NMR spectrum of PTZ-2 in CDCl<sub>3</sub>.

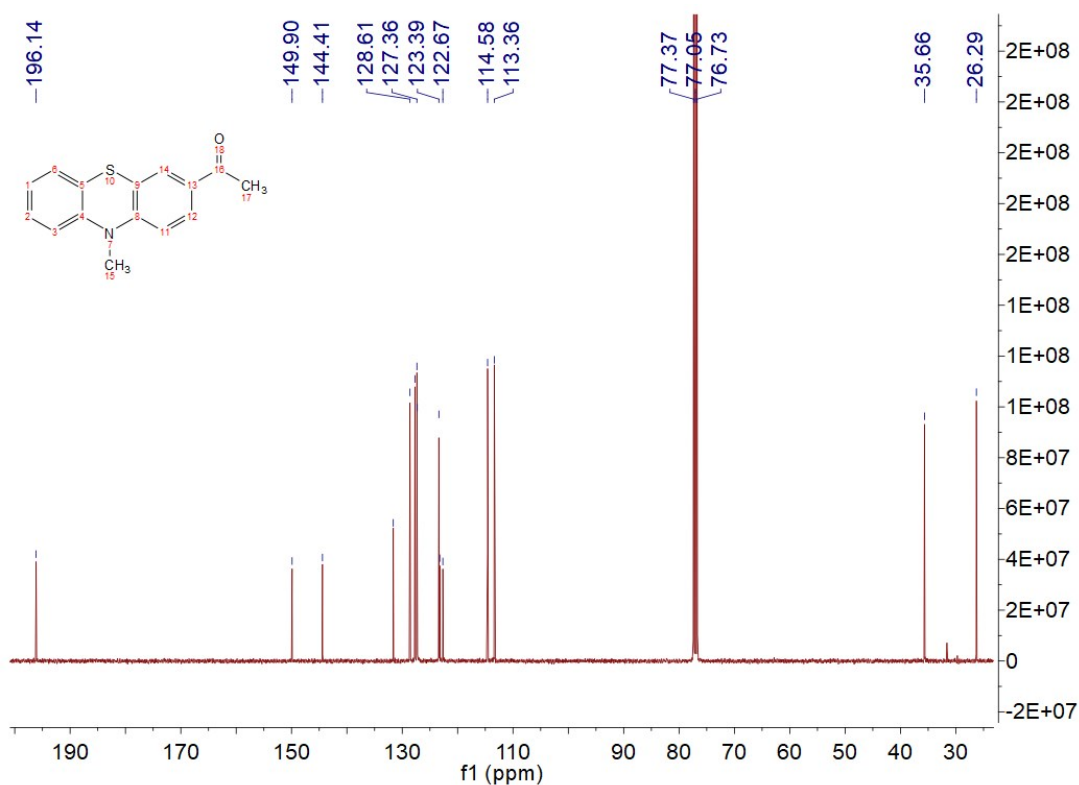

Fig. S24. <sup>13</sup>C NMR spectrum of PTZ-2 in CDCl<sub>3</sub>.



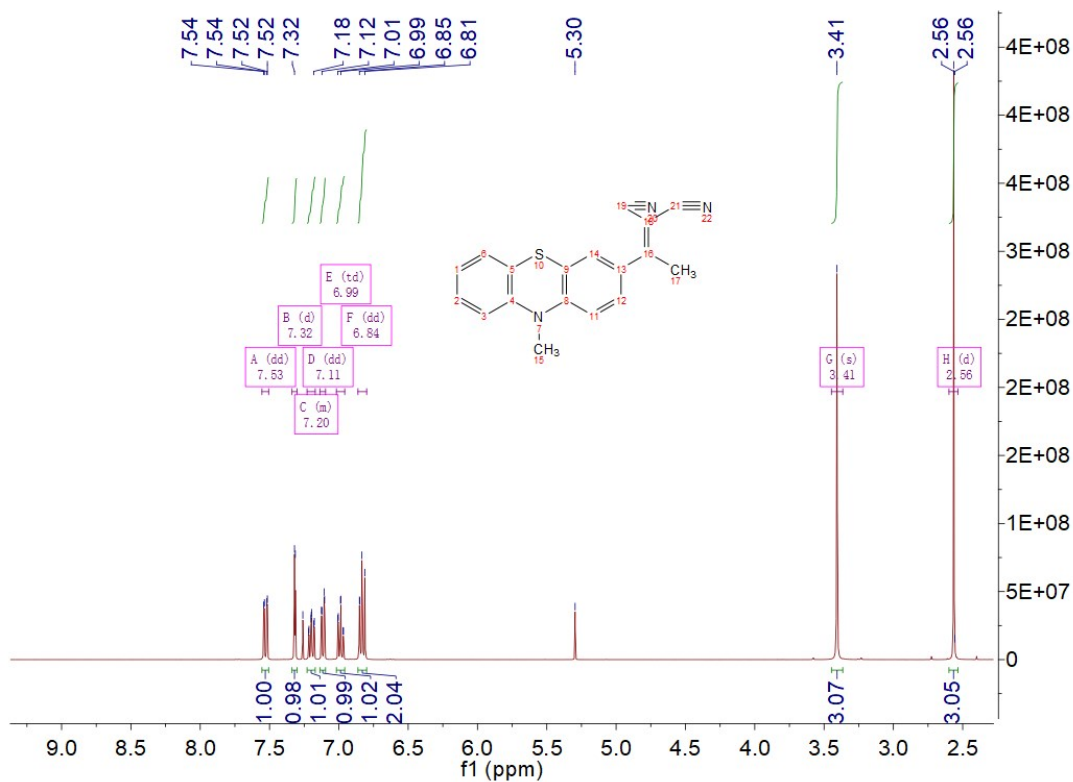

Fig. S25. <sup>1</sup>H NMR spectrum of PTZ-3 in CDCl<sub>3</sub>.

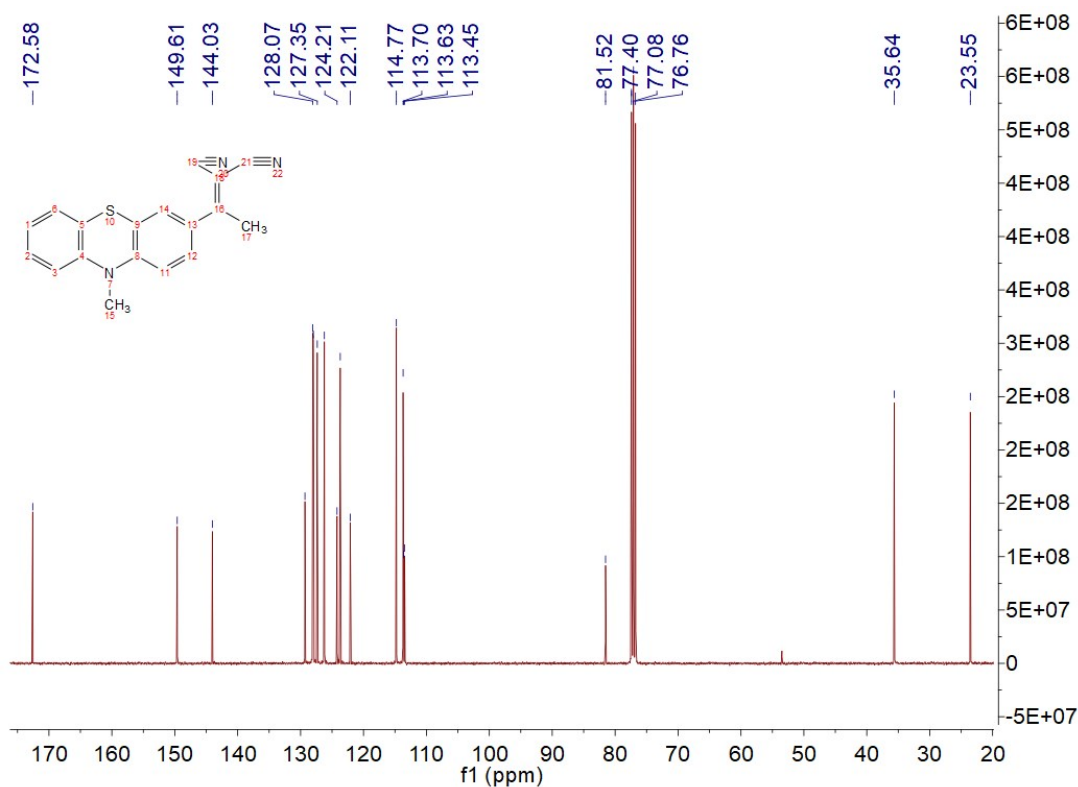

Fig. S26. <sup>13</sup>C NMR spectrum of PTZ-3 in CDCl<sub>3</sub>.

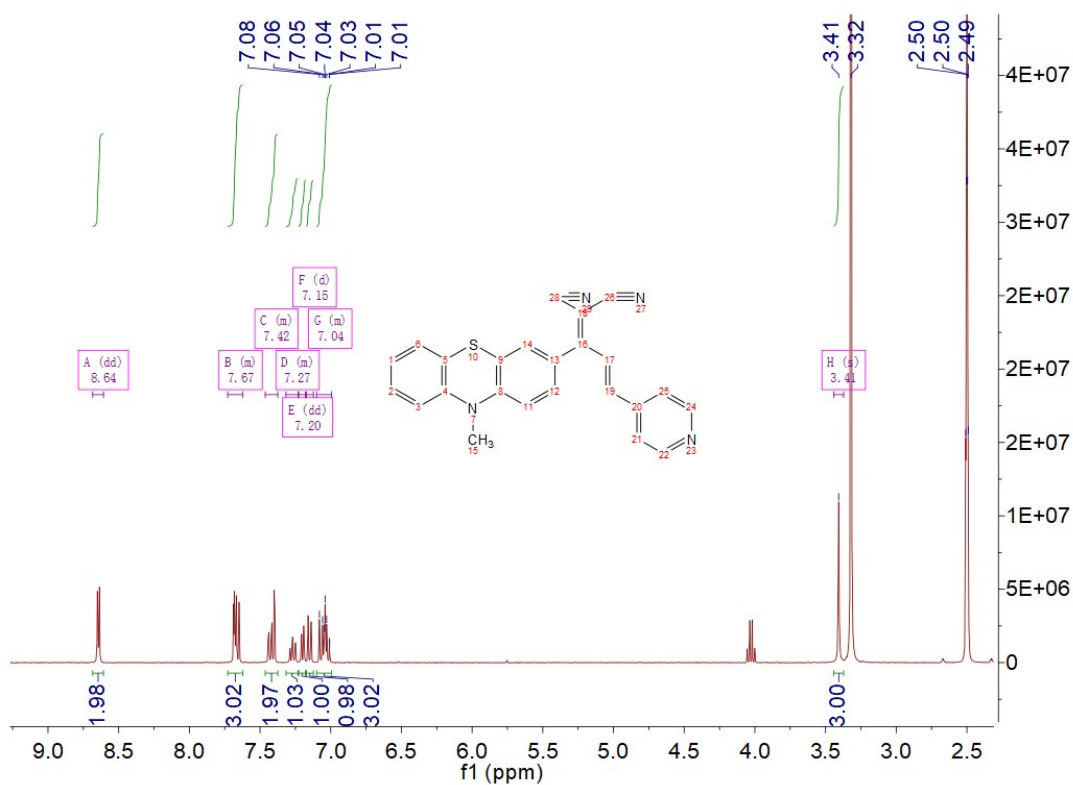

Fig. S27. <sup>1</sup>H NMR spectrum of NPTZ-P1 in DMSO.

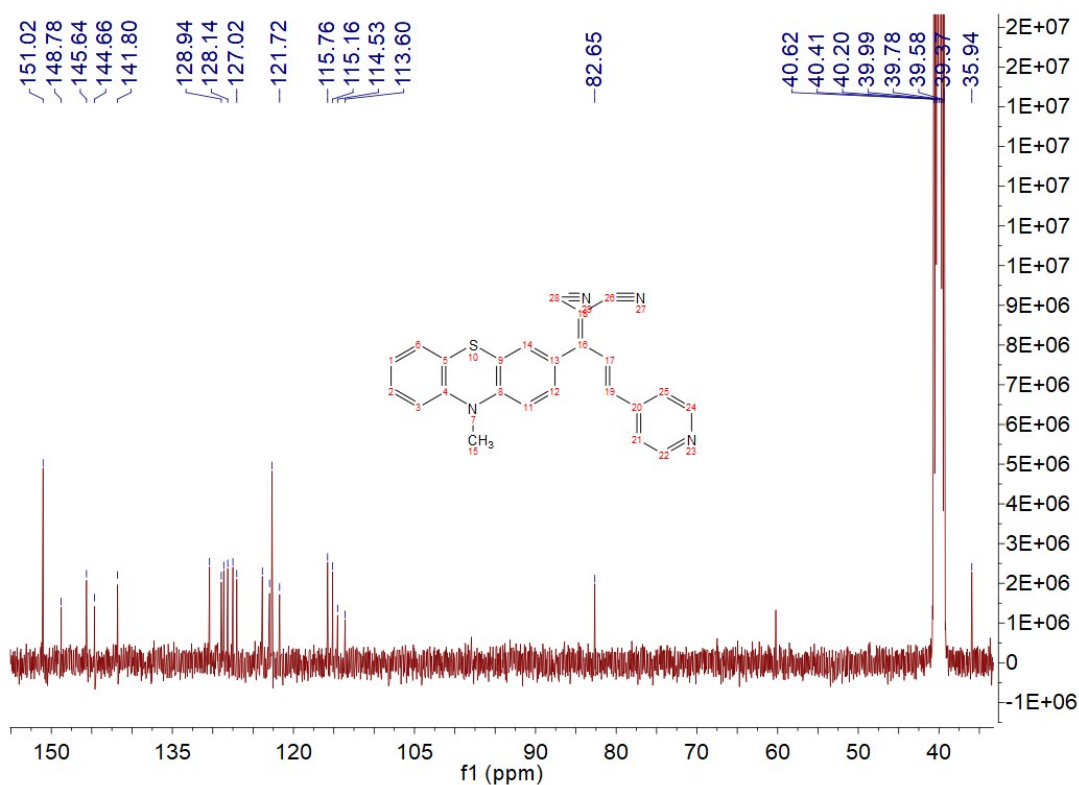

Fig. S28. <sup>13</sup>C NMR spectrum of NPTZ-P1 in DMSO.

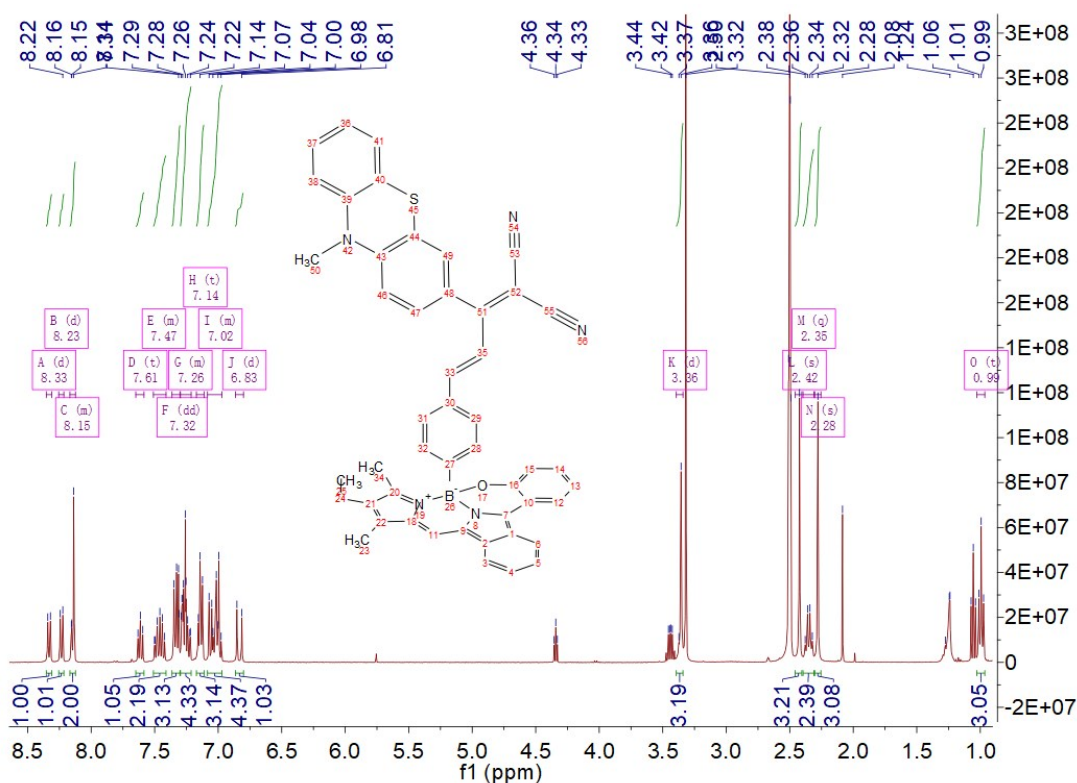

Fig. S29.  $^1\text{H}$  NMR spectrum of NPTZ-P2 in DMSO.

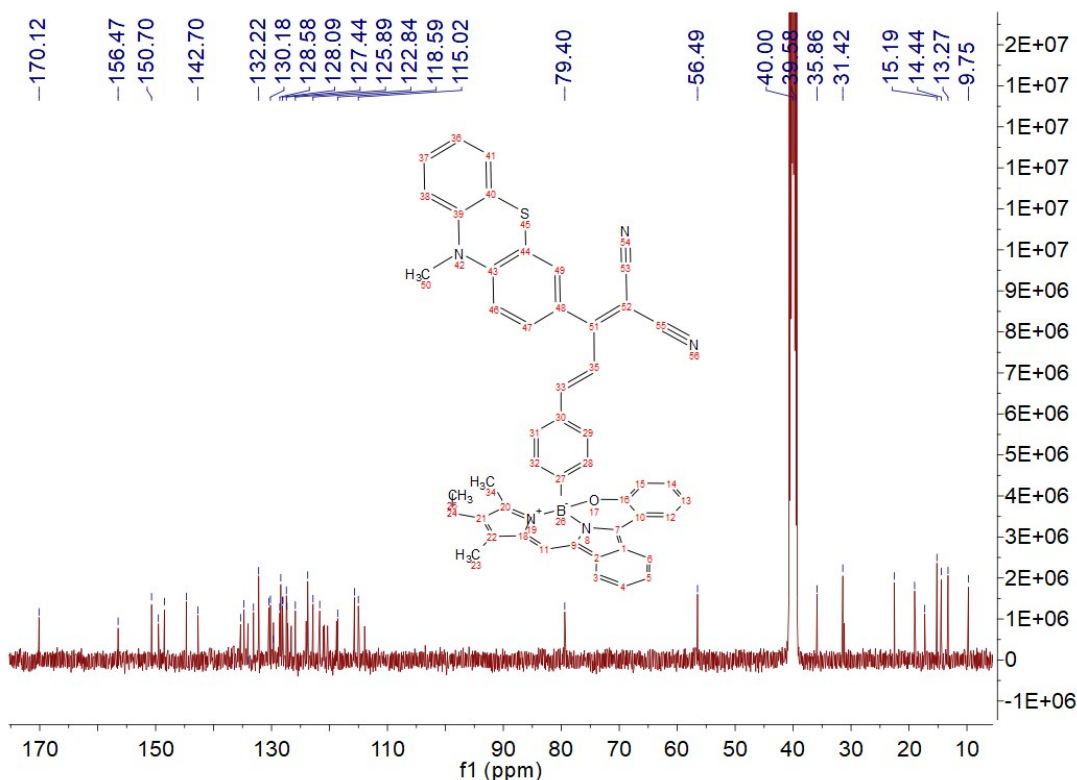

Fig. S30.  $^{13}\text{C}$  NMR spectrum of NPTZ-P2 in DMSO.

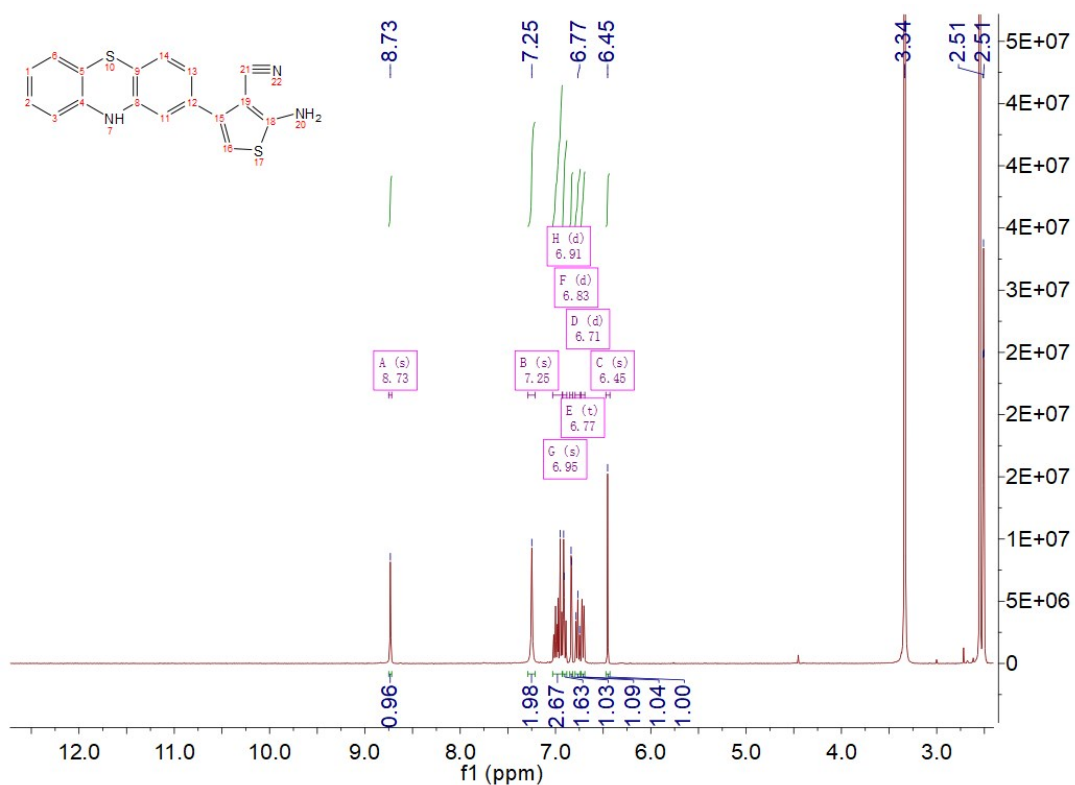

**Fig. S31.** <sup>1</sup>H NMR spectrum of **SF1** in DMSO.

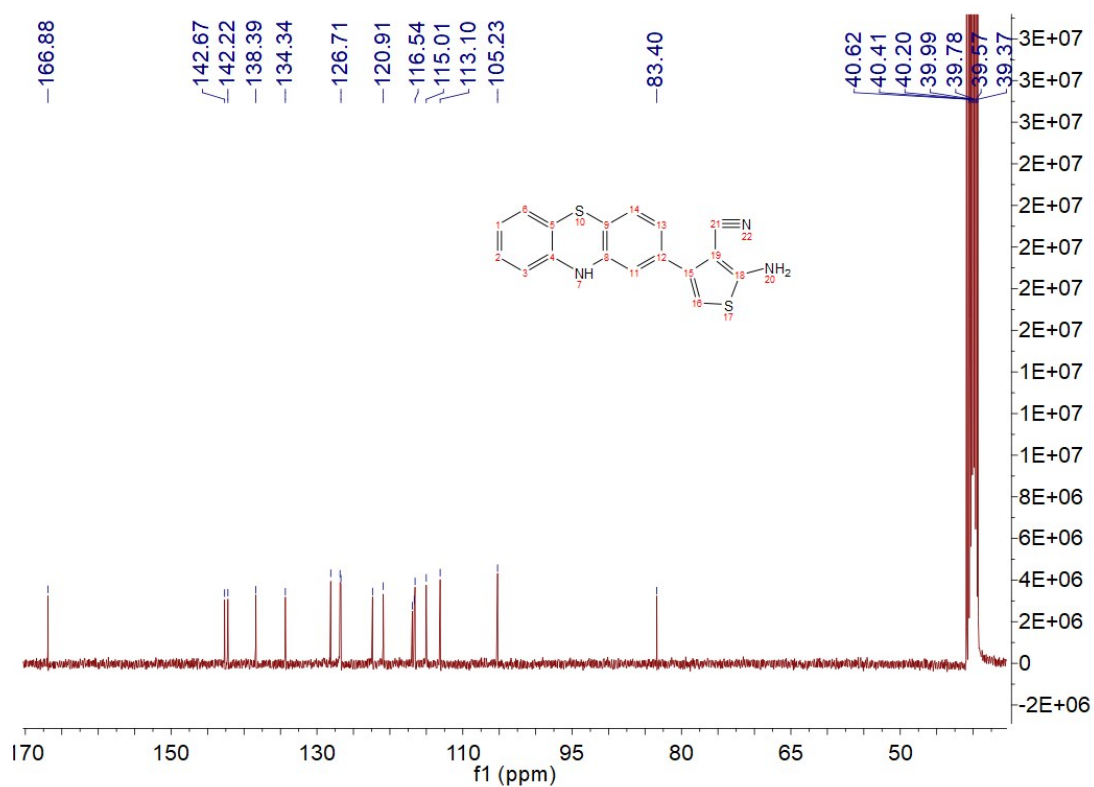

**Fig. S32.** <sup>13</sup>C NMR spectrum of **SF1** in DMSO.

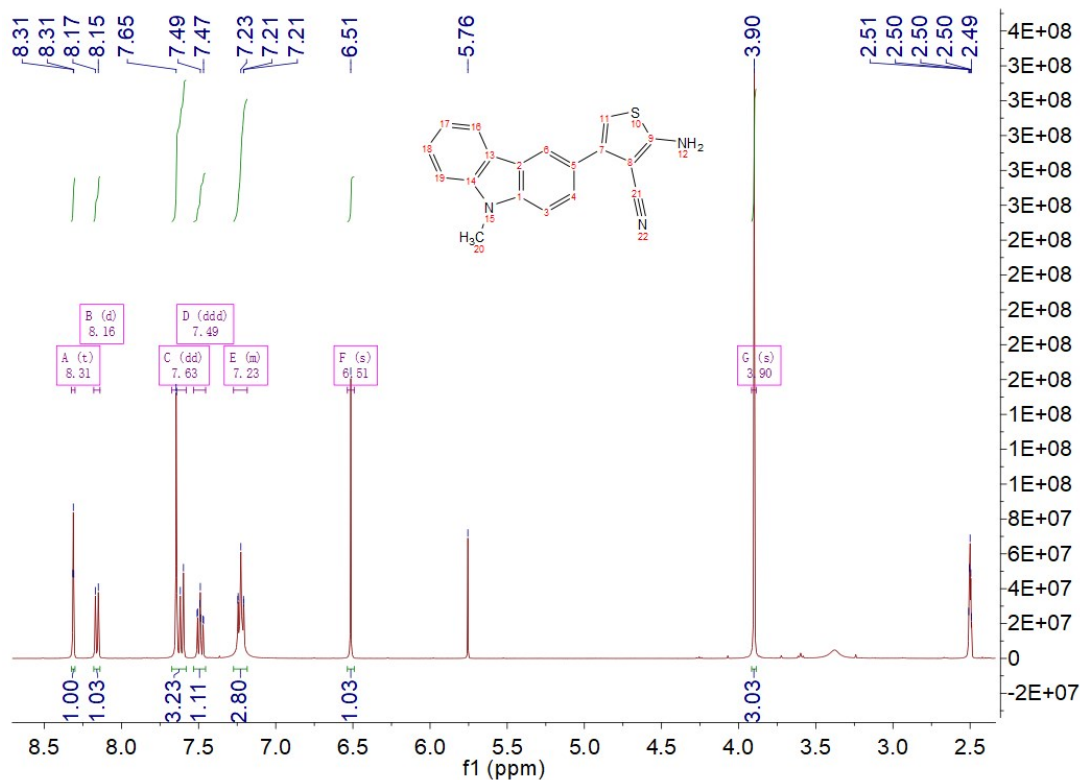

Fig. S33.  $^1\text{H}$  NMR spectrum of SF2 in DMSO.

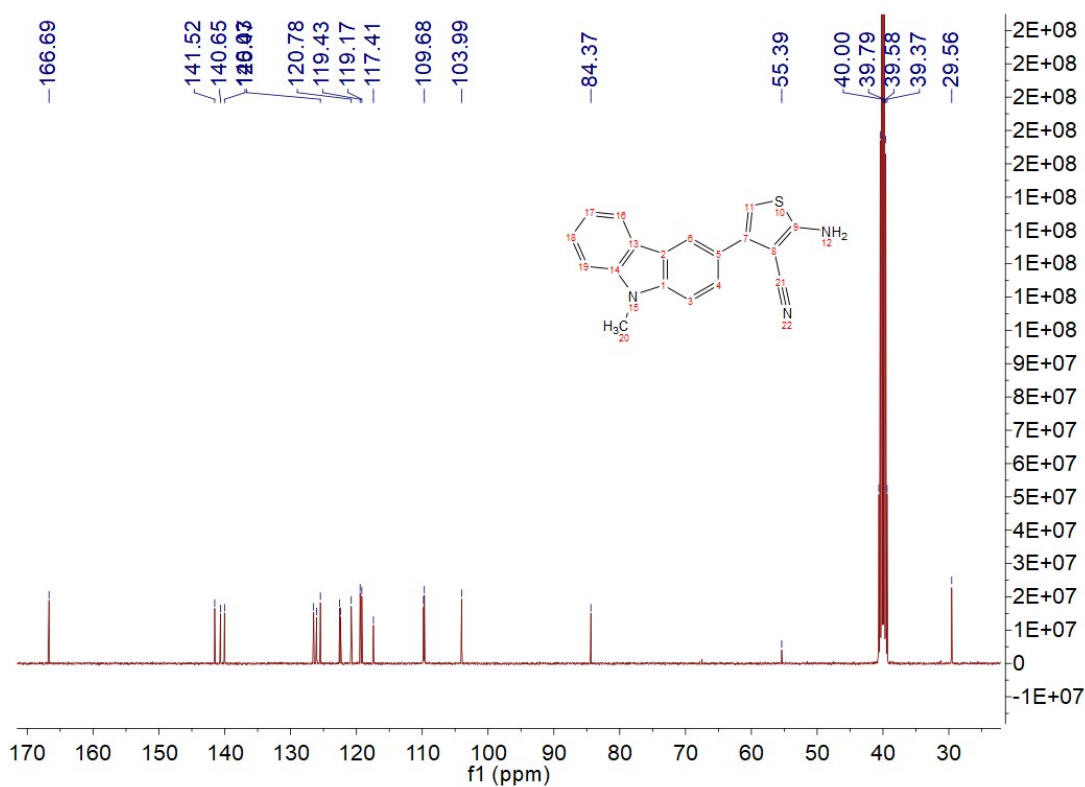

Fig. S34.  $^{13}\text{C}$  NMR spectrum of SF2 in DMSO.

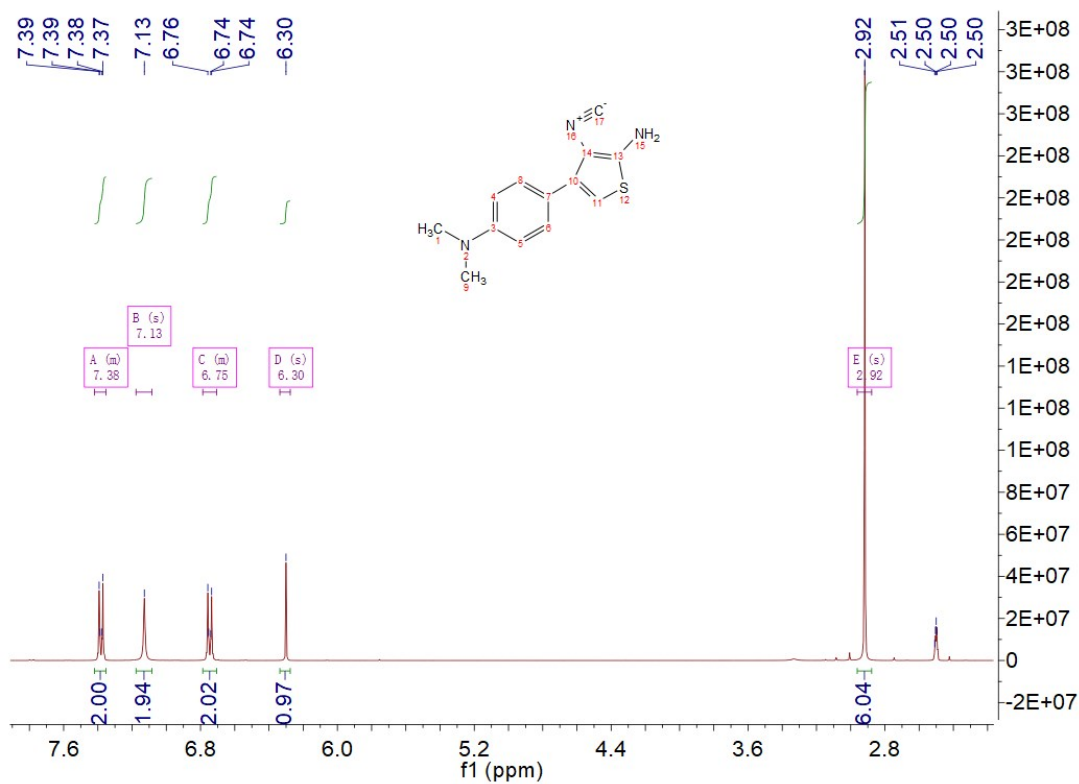

Fig. S35. <sup>1</sup>H NMR spectrum of SF3 in DMSO.

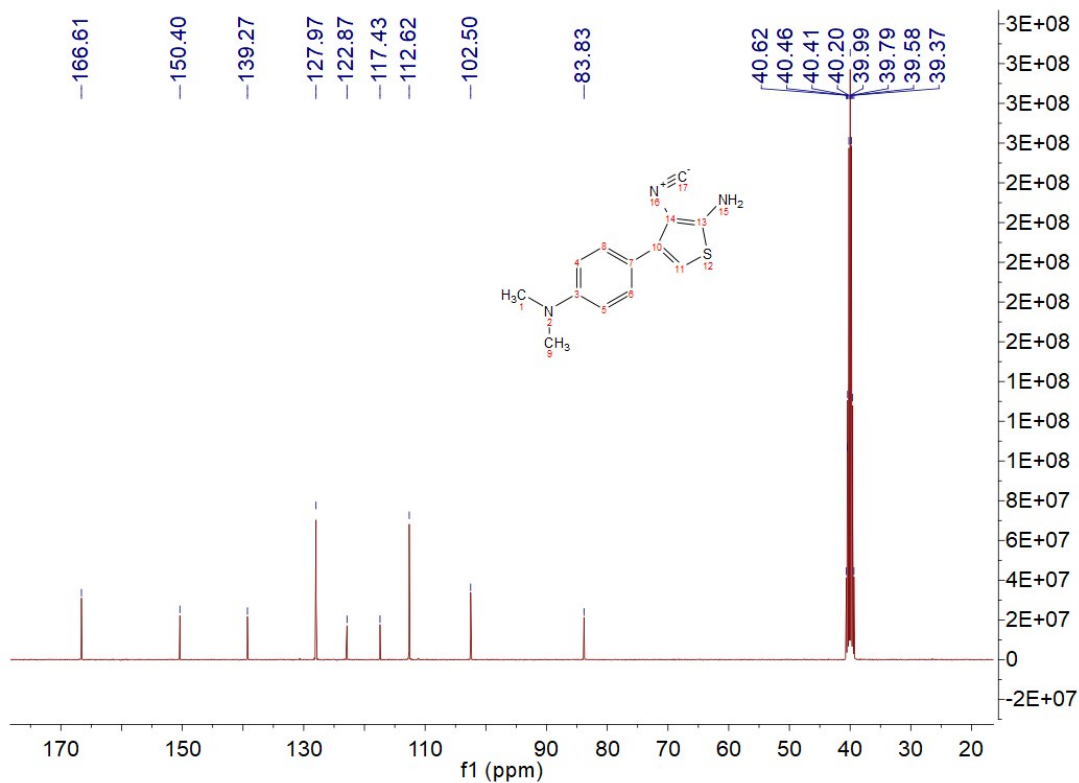

Fig. S36. <sup>13</sup>C NMR spectrum of SF3 in DMSO.



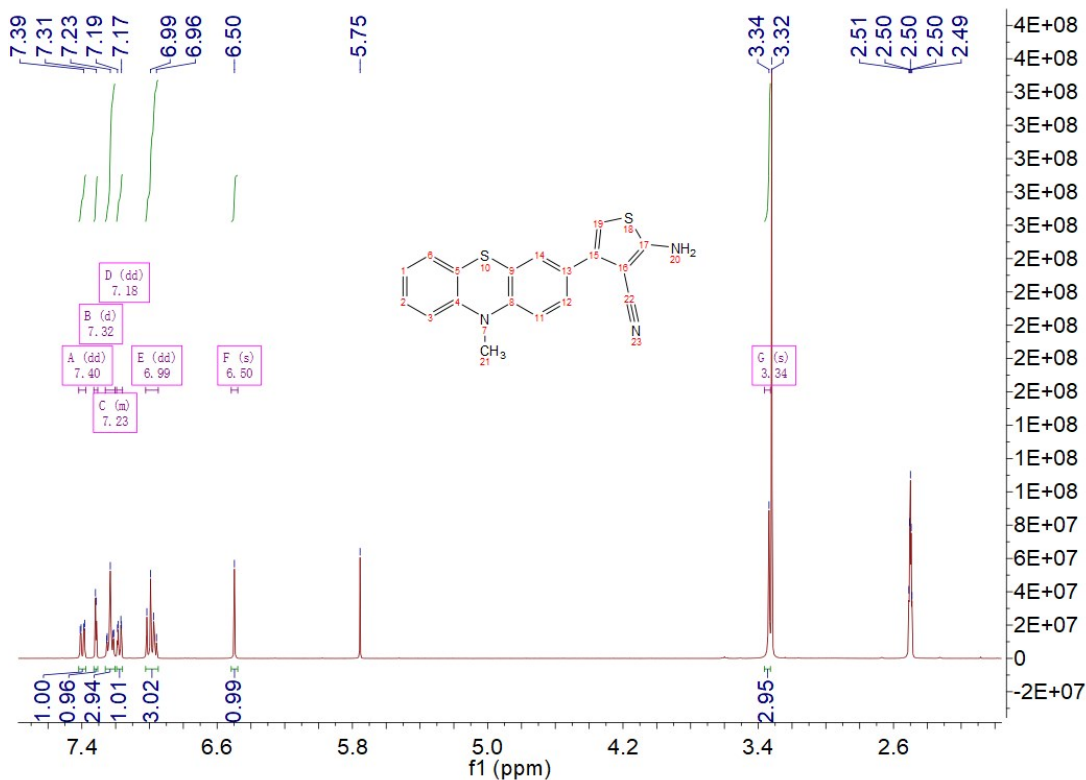

Fig. S37. <sup>1</sup>H NMR spectrum of SF4 in DMSO.

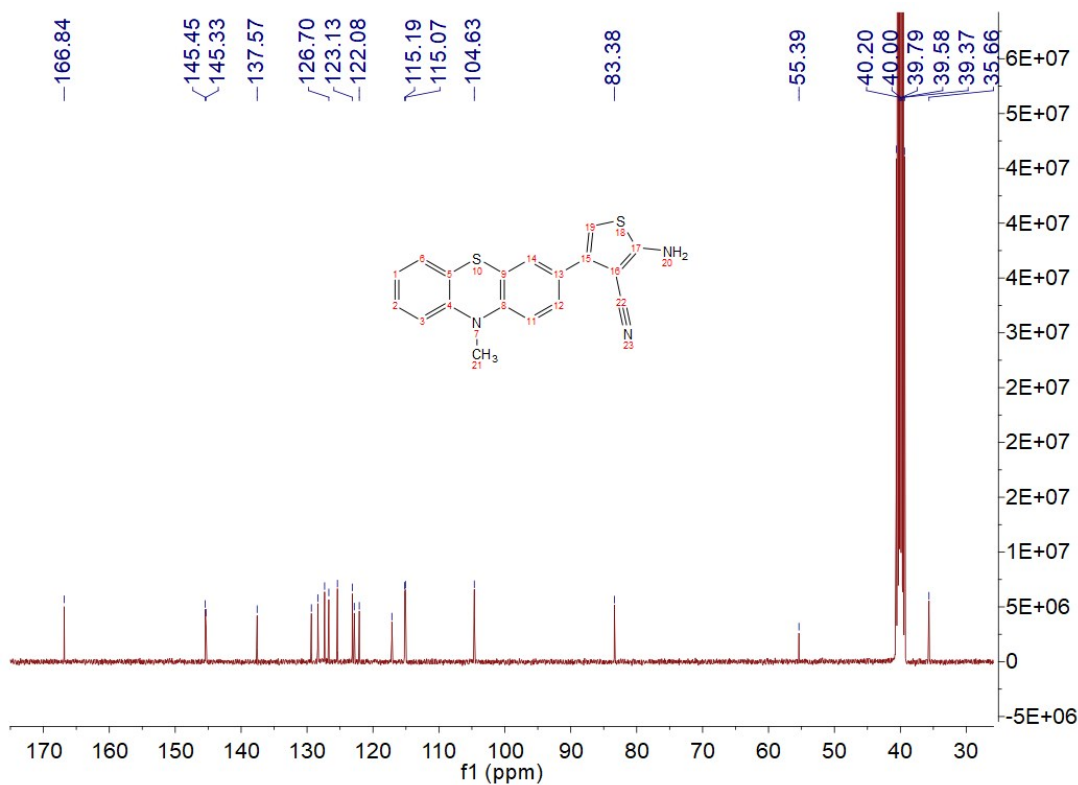

Fig. S38. <sup>13</sup>C NMR spectrum of SF4 in DMSO.



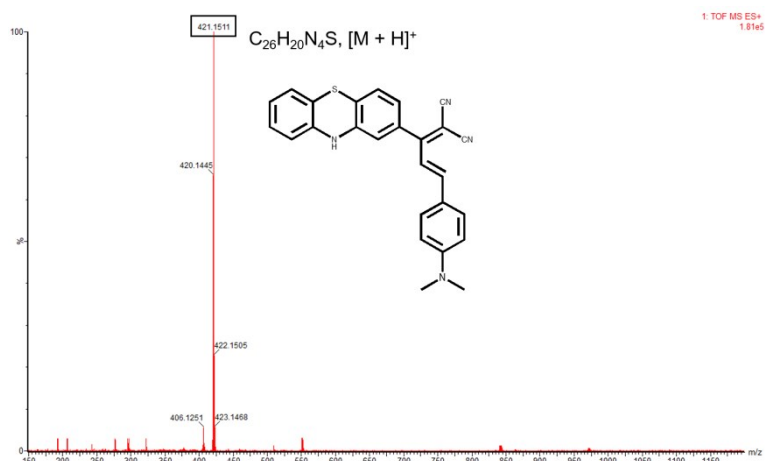

Fig. S39. HRMS spectra of PTZ-P1.

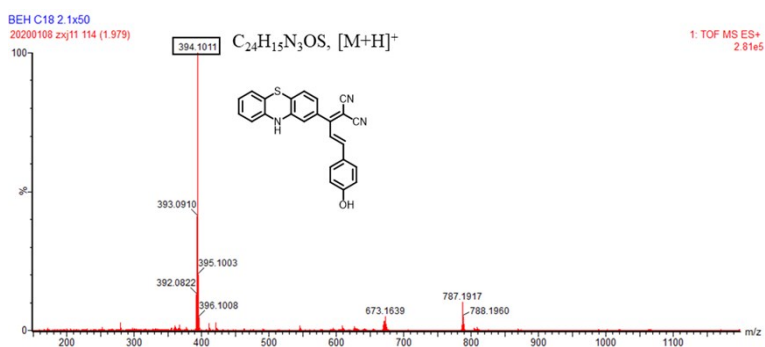

Fig. S40. HRMS spectra of PTZ-P2.

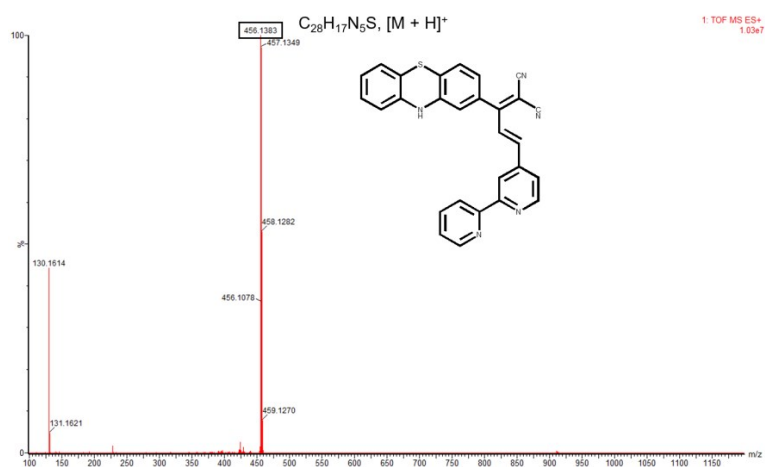

Fig. S41. HRMS spectra of PTZ-P4.

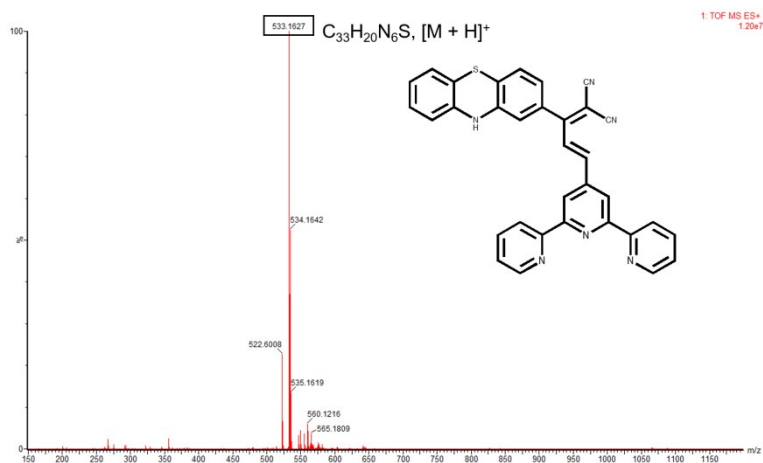

Fig. S42. HRMS spectra of **PTZ-P5**.

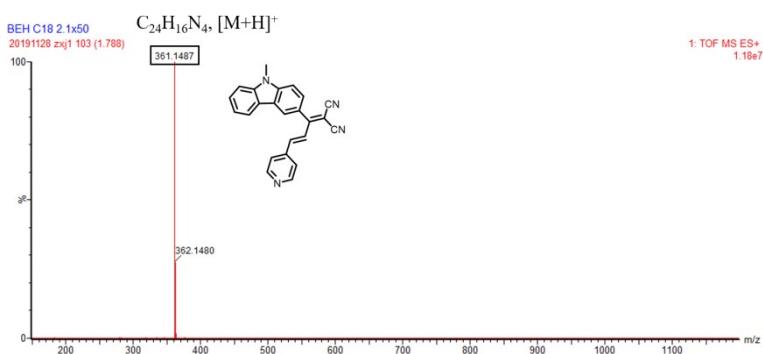

Fig. S43. HRMS spectra of **KZ-P**.

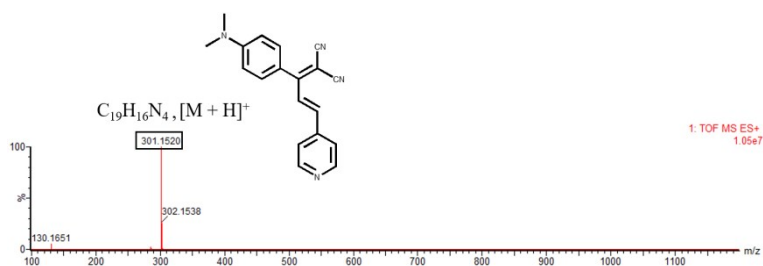

Fig. S44. HRMS spectra of **NNP-P**.

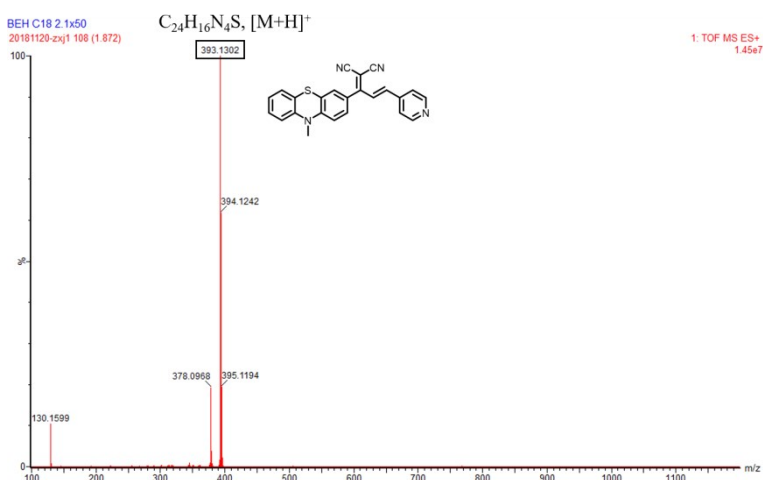

Fig. S45. HRMS spectra of **NPTZ-P1**.

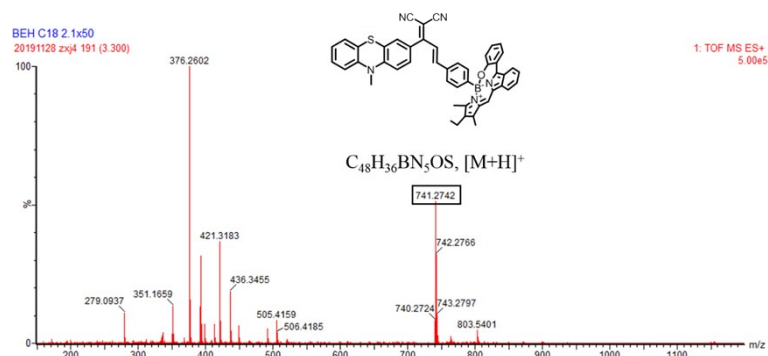

Fig. S46. HRMS spectra of NPTZ-P2.

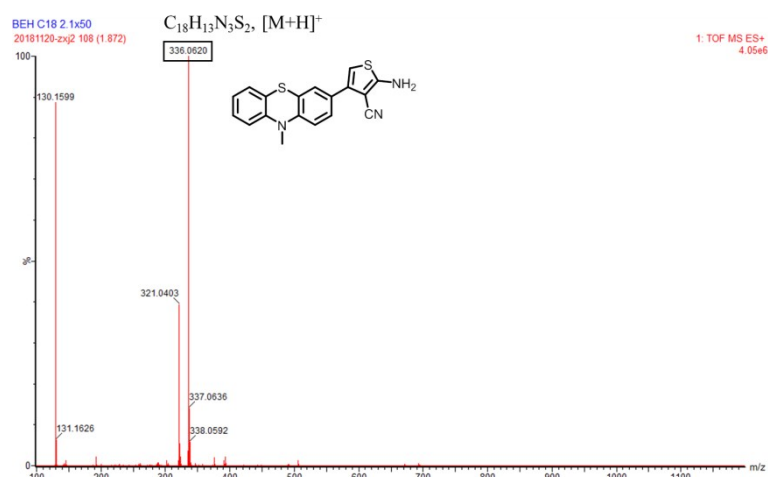

Fig. S47. HRMS spectra of SF4.

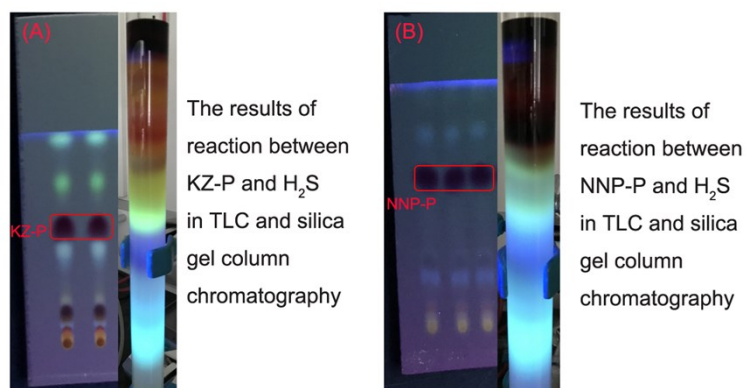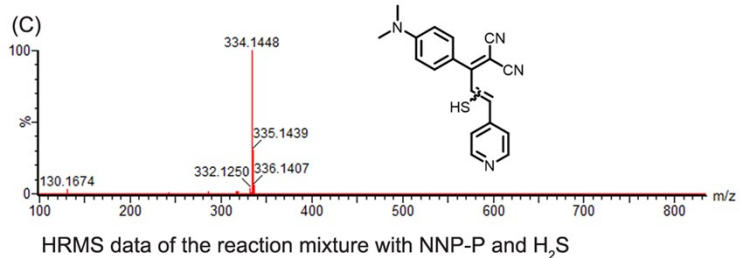

Fig. S48. The results of KZ-P and NNP-P reacted with H<sub>2</sub>S.

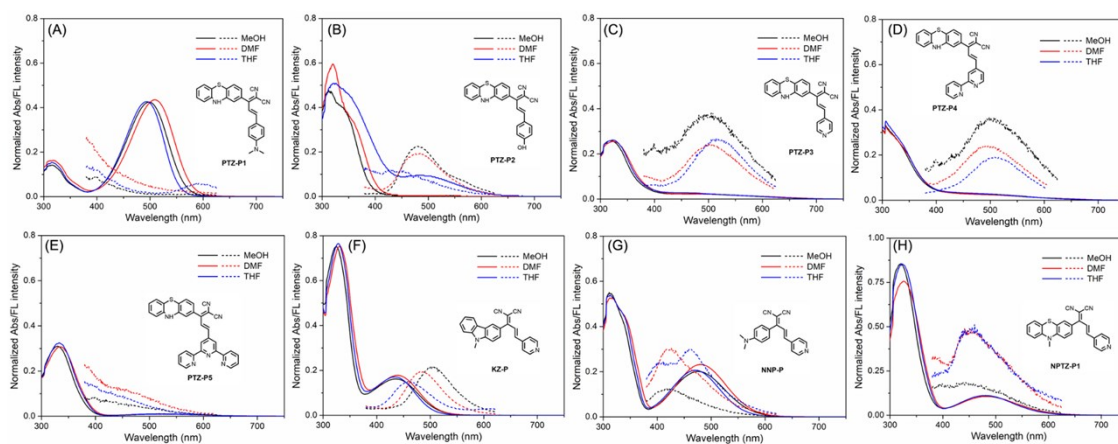

**Fig. S49.** Absorption and fluorescent spectra of probes (10  $\mu$ M, **PTZ-P1**, **PTZ-P2**, **PTZ-P3**, **PTZ-P4**, **PTZ-P5**, **KZ-P**, **NNP-P** and **NPTZ-P1**) in different solvents (MeOH, DMF and THF),  $\lambda_{\text{ex}}=330$  nm. Full lines and dotted lines represent absorption and fluorescent spectra respectively.

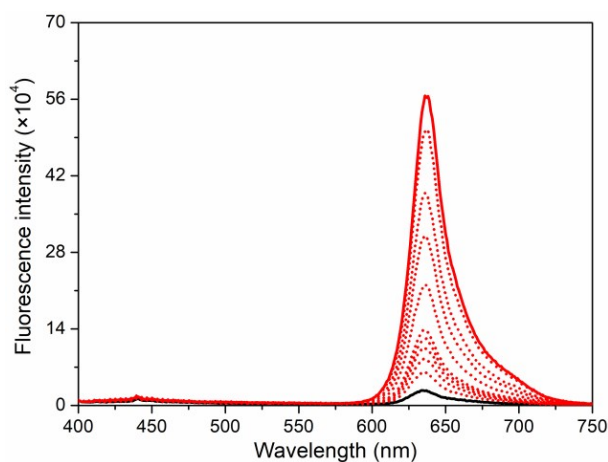

**Fig. S50.** Fluorescent spectra of **NPTZ-P2** (10  $\mu$ M) in PBS buffer (pH=7.4)/DMSO (1/2, 2% v/v PEG 400) with addition of  $\text{H}_2\text{S}$  (0-600  $\mu$ M),  $\lambda_{\text{ex}}=390$  nm.

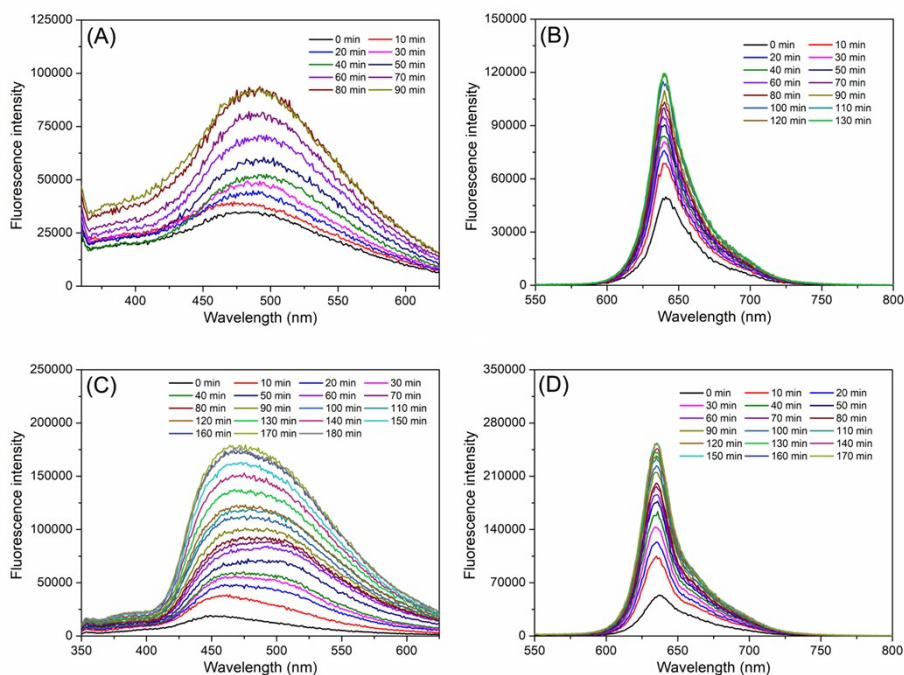

**Fig. S51.** Time-dependent fluorescence intensity changes of **PTZ-P1** (A), **PTZ-P6** (B), **NPTZ-P1** (C) and **NPTZ-P2** (D) (10  $\mu$ M) with  $\text{H}_2\text{S}$  (100  $\mu$ M) in PBS buffer (pH=7.4)/DMSO (1/2 v/v, 2% PEG 400).

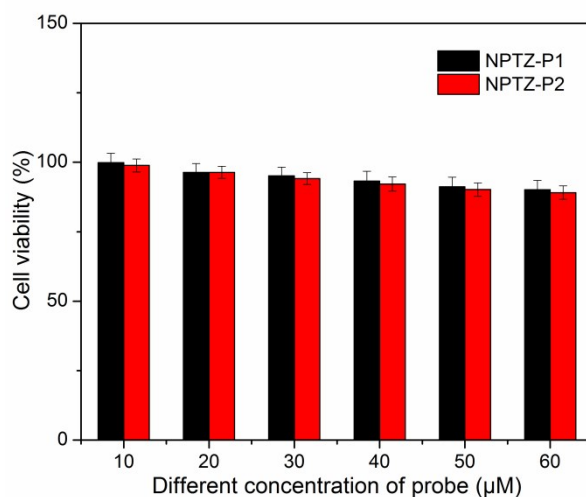

**Fig. S52.** Viabilities of HeLa cells after incubation with different concentrations of **NPTZ-P1** and **NPTZ-P2** for 24 h.

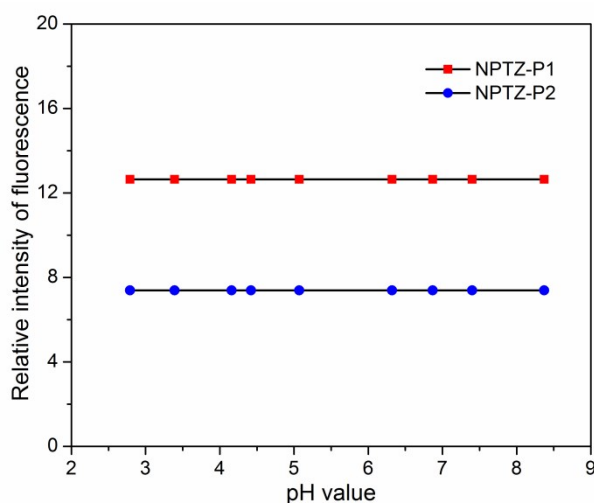

**Fig. S53.** The fluorescence emission changes with the pH titration curve of 10 µM **NPTZ-P1** ( $\lambda_{\text{ex}}=330$  nm,  $\lambda_{\text{ex}}=455$  nm) and **NPTZ-P2** ( $\lambda_{\text{ex}}=550$  nm,  $\lambda_{\text{ex}}=635$  nm), pH value: 2.79, 3.39, 4.16, 4.42, 5.07, 6.32, 6.87, 7.4, 8.37 (from left to right).

**Table S1.** Calculated linear absorption properties (nm), excitation energy (eV), oscillator strengths and major contribution for selected compounds

| Compounds      | Energy Gap (eV) | $\lambda$ (nm) | $f$    | Composition            | HOMO (eV) | LUMO (eV) |
|----------------|-----------------|----------------|--------|------------------------|-----------|-----------|
| <b>PTZ-P1</b>  | 2.2110          | 560.75         | 0.0593 | HOMO→LUMO<br>(0.70057) | -5.15     | -2.50     |
| <b>PTZ-P2</b>  | 2.0484          | 605.27         | 0.0540 | HOMO→LUMO<br>(0.70402) | -5.29     | -2.81     |
| <b>PTZ-P3</b>  | 1.8044          | 687.11         | 0.0510 | HOMO→LUMO<br>(0.70478) | -5.46     | -3.23     |
| <b>PTZ-P4</b>  | 1.8230          | 680.12         | 0.0559 | HOMO→LUMO<br>(0.70467) | -5.44     | -3.21     |
| <b>PTZ-P5</b>  | 1.8382          | 674.48         | 0.0544 | HOMO→LUMO<br>(0.70453) | -5.37     | -3.11     |
| <b>KZ-P</b>    | 2.5581          | 484.67         | 0.1602 | HOMO→LUMO<br>(0.6986)  | -5.90     | -2.99     |
| <b>NNP-P</b>   | 2.5643          | 483.51         | 0.2353 | HOMO→LUMO<br>(0.7009)  | -5.71     | -2.86     |
| <b>NPTZ-P1</b> | 2.1084          | 588.06         | 0.1427 | HOMO→LUMO<br>(0.70328) | -5.57     | -3.11     |
